# Supplementary material for: Vocalization categorization behavior explained by a feature-based auditory categorization model
Source: eLife. 2022 Oct 13;11:e78278. doi: 10.7554/eLife.78278 (PMC9633061; doi:10.7554/eLife.78278)
Supplement: Figure 1—figure supplement 1—source data 1. [file elife-78278-fig1-figsupp1-data1.xlsx]

## Sheet: FigS1A_ChutPurr_Hit_FA
probability(Hit)
	Day-1	Day-2	Day-3	Day-4	Day-5	Day-6	Day-7	Day-8	Day-9	Day-10	Day-11	Day-12	Day-13	Day-14	Day-15	Day-16	Day-17	Day-18	Day-19	Day-20	Day-21	Day-22	Day-23
GP-1	NaN	NaN	0.866667	0.850807	0.789773	0.872205	0.938445	0.864792	0.949247	0.953026	0.923571	NaN	0.736842	0.714286	0.537836	0.759104	0.828321	0.781611	NaN	0.863297	0.682922	NaN	0.678344
GP-2	0.733358	0.742395	0.922619	0.575397	0.576923	0.721014	0.584055	0.509524	0.581389	0.710317	0.656872	0.875943	0.38222	0.722159	0.592597	0.916756	0.862976	0.826029	0.844753	0.918823	0.918282	0.878761	0.901949
GP-3	0.810005	0.859367	0.695888	0.454167	0.692588	0.618176	0.812803	0.680922	0.845636	0.564951	0.825701	0.786404	0.872114	0.878377	0.926793	0.972073	0.752784	NaN	NaN	NaN	NaN	NaN	NaN
GP-4	0.746949	0.752688	0.96303	0.871927	0.784565	0.680977	0.851197	NaN	NaN	NaN	NaN	NaN	NaN	NaN	NaN	NaN	NaN	NaN	NaN	NaN	NaN	NaN	NaN
Mean	0.763437	0.784817	0.862051	0.688075	0.710962	0.723093	0.796625	0.685079	0.792091	0.742765	0.802048	0.831173	0.663725	0.771607	0.685742	0.882644	0.814694	0.80382	0.844753	0.89106	0.800602	0.878761	0.790146
probability(FA)
	Day-1	Day-2	Day-3	Day-4	Day-5	Day-6	Day-7	Day-8	Day-9	Day-10	Day-11	Day-12	Day-13	Day-14	Day-15	Day-16	Day-17	Day-18	Day-19	Day-20	Day-21	Day-22	Day-23
GP-1	NaN	NaN	0.4	0.785841	0.758929	0.865385	0.864	0.321602	0.274643	0.181548	0.338333	NaN	0.272727	0.25	0.100303	0.280342	0.20202	0.111711	NaN	0.127866	0.0679048	NaN	0.114857
GP-2	0.843889	0.705425	0.845238	0.786667	0.4	0.828333	0.498611	0.537037	0.475323	0.725446	0.7003	0.789008	0.397096	0.710668	0.340257	0.739583	0.672008	0.583005	0.378421	0.305985	0.149779	0.29578	0.251223
GP-3	0.58287	0.841818	0.51717	0.466667	0.487179	0.486863	0.667805	0.48928	0.778749	0.427991	0.462414	0.407708	0.415095	0.207902	0.224801	0.304094	0.183995	NaN	NaN	NaN	NaN	NaN	NaN
GP-4	0.715418	0.762605	0.896866	0.447937	0.352548	0.338604	0.347744	NaN	NaN	NaN	NaN	NaN	NaN	NaN	NaN	NaN	NaN	NaN	NaN	NaN	NaN	NaN	NaN
Mean	0.714059	0.769949	0.664819	0.621778	0.499664	0.629796	0.59454	0.449306	0.509572	0.444995	0.500349	0.598358	0.361639	0.389523	0.221787	0.44134	0.352674	0.347358	0.378421	0.216926	0.108842	0.29578	0.18304

## Sheet: FigS1B_ChutPurr_dPrime
d'
	Day-1	Day-2	Day-3	Day-4	Day-5	Day-6	Day-7	Day-8	Day-9	Day-10	Day-11	Day-12	Day-13	Day-14	Day-15	Day-16	Day-17	Day-18	Day-19	Day-20	Day-21	Day-22	Day-23
GP-1	NaN	NaN	1.36412	0.23361	0.246403	0.0549347	0.153049	1.99249	2.41875	2.94969	2.64477	NaN	1.23823	1.24044	1.30707	1.35201	1.81887	2.21534	NaN	2.46857	2.30594	NaN	1.83167
GP-2	-0.272405	0.124588	0.406618	-1.06367	0.447375	-0.756866	0.220761	-0.107883	0.301745	-0.0260895	-0.0643572	0.391957	-0.117672	0.00808313	0.678572	0.692346	0.819627	0.703025	1.85715	2.20897	2.75956	2.07657	2.32396
GP-3	0.729172	-0.13094	0.585238	-0.0245729	0.572087	0.341255	0.472425	0.625915	0.418949	0.392906	1.04998	1.0669	1.36643	2.06879	2.39307	2.49525	1.86806	NaN	NaN	NaN	NaN	NaN	NaN
GP-4	0.0544838	-0.0665209	0.697676	1.44568	1.32347	0.944516	1.72993	NaN	NaN	NaN	NaN	NaN	NaN	NaN	NaN	NaN	NaN	NaN	NaN	NaN	NaN	NaN	NaN
Mean	0.170417	-0.0242909	0.763413	0.147762	0.647333	0.14596	0.644042	0.836842	1.04648	1.1055	1.21013	0.72943	0.828993	1.10577	1.45957	1.5132	1.50218	1.45918	1.85715	2.33877	2.53275	2.07657	2.07782

## Sheet: FigS1C_Chut_purr
probability(Hit)
	Session-1	Session-2	Session-3	Session-4	Session-5	Session-6
GP-1	0.923416	0.88327	0.873106	0.788247	0.870968	NaN
GP-2	0.937406	0.875429	0.760284	0.639957	0.660326	NaN
GP-3	0.942995	0.885957	0.607306	0.558816	NaN	NaN
GP-4	0.949583	0.920882	0.823661	0.968095	0.876263	0.771005
Mean	0.93835	0.891385	0.766089	0.738779	0.802519	0.771005
probability(FA)
	Session-1	Session-2	Session-3	Session-4	Session-5	Session-6
GP-1	0.460294	0.27408	0.305379	0.228254	0.157895	NaN
GP-2	0.547619	0.41084	0.361607	0.218872	0.222222	NaN
GP-3	0.315476	0.152137	0.287454	0.308673	NaN	NaN
GP-4	0.615553	0.428419	0.184603	0.292478	0.188954	0.0808824
Mean	0.484736	0.316369	0.284761	0.262069	0.18969	0.0808824

## Sheet: FigS1D_WheekWhine_Hit_FA
probability(Hit)
	Day-1	Day-2	Day-3	Day-4	Day-5	Day-6	Day-7	Day-8	Day-9	Day-10	Day-11	Day-12	Day-13	Day-14	Day-15
GP-1	0.1	0.190909	0.633913	0.837836	0.86724	0.900578	0.899936	0.862475	0.861795	0.818796	0.899474	0.869665	0.785463	0.867741	0.918659
GP-2	0.272727	0.22619	0.506872	0.776526	0.749429	0.812242	0.827923	0.73394	0.814295	0.799236	0.831569	0.852718	0.835749	0.847368	0.933182
GP-3	0.283333	0.27	0.125	NaN	NaN	NaN	NaN	NaN	0.154902	0.344828	0.723571	0.788615	0.906123	0.755831	0.849825
GP-4	0.1	0.27193	0.831449	0.878901	0.961304	0.878228	0.902681	0.840642	0.808231	0.943184	0.886143	0.930135	0.838718	0.858254	NaN
Mean	0.189015	0.239757	0.524308	0.831087	0.859325	0.863683	0.876847	0.812352	0.659806	0.726511	0.835189	0.860283	0.841513	0.832299	0.900555
probability(FA)
	Day-1	Day-2	Day-3	Day-4	Day-5	Day-6	Day-7	Day-8	Day-9	Day-10	Day-11	Day-12	Day-13	Day-14	Day-15
GP-1	0.0416667	0.307143	0.655734	0.789617	0.787971	0.838993	0.854341	0.739184	0.765424	0.684301	0.703102	0.437109	0.503274	0.39892	0.441855
GP-2	0.01	0.383901	0.525714	0.773686	0.614809	0.769609	0.684599	0.673239	0.652381	0.450179	0.501554	0.376175	0.577381	0.560281	0.446717
GP-3	0.432692	0.311111	0.181818	NaN	NaN	NaN	NaN	NaN	0.136364	0.272727	0.5	0.521759	0.414815	0.385338	0.447619
GP-4	0.35	0.295739	0.809632	0.917705	0.90446	0.823647	0.759395	0.642853	0.703563	0.803053	0.41587	0.514093	0.22461	0.152917	NaN
Mean	0.20859	0.324474	0.543225	0.827003	0.76908	0.81075	0.766112	0.685092	0.564433	0.552565	0.530131	0.462284	0.43002	0.374364	0.445397

## Sheet: FigS1E_WheekWhine_dPrime
d'
	Day-1	Day-2	Day-3	Day-4	Day-5	Day-6	Day-7	Day-8	Day-9	Day-10	Day-11	Day-12	Day-13	Day-14	Day-15
GP-1	0.450113	-0.352547	-0.044462	0.173181	0.235152	0.193411	0.174859	0.46391	0.440814	0.424638	0.896589	1.33989	0.816898	1.54552	1.89364
GP-2	1.72176	-0.462982	-0.0399205	-0.135544	0.34151	0.0715509	0.615795	0.189265	0.517497	0.949301	1.12126	1.4983	0.805617	0.760653	1.76993
GP-3	-0.559989	-0.171725	-0.241892	NaN	NaN	NaN	NaN	NaN	0.101982	0.205262	0.633169	0.835263	1.5822	1.04541	1.2679
GP-4	-0.896231	-0.0638734	-0.108732	-0.0703957	0.521028	0.102	0.688144	0.511973	0.202784	0.736255	1.50508	1.62282	2.14267	2.65617	NaN
Mean	0.178914	-0.262782	-0.108751	-0.0109194	0.365897	0.122321	0.492933	0.388383	0.315769	0.578864	1.03903	1.32407	1.33684	1.50194	1.64382

## Sheet: FigS1F_WheekWhine
probability(Hit)
	Session-1	Session-2	Session-3	Session-4	Session-5	Session-6	Session-7
GP-1	0.89727	0.941063	0.919335	0.931097	0.812169	0.947368	NaN
GP-2	0.865272	0.867611	0.835292	0.812812	0.717832	0.639493	NaN
GP-3	0.89914	0.935761	0.83694	0.889224	0.764498	0.791289	0.8125
GP-4	0.889167	0.885526	0.878767	0.753711	0.82231	0.607895	NaN
Mean	0.887712	0.90749	0.867584	0.846711	0.779202	0.746511	0.8125
probability(FA)
	Session-1	Session-2	Session-3	Session-4	Session-5	Session-6	Session-7
GP-1	0.311189	0.484615	0.328297	0.207925	0.111111	0.403743	NaN
GP-2	0.169485	0.268541	0.210125	0.165675	0.136526	0.0919118	NaN
GP-3	0.421016	0.44881	0.332237	0.238688	0.255556	0.188312	0.166667
GP-4	0.0635417	0.236201	0.125496	0.211819	0.104167	0	NaN
Mean	0.241308	0.359542	0.249039	0.206026	0.15184	0.170992	0.166667
