# Supplementary material for: Vocalization categorization behavior explained by a feature-based auditory categorization model
Source: eLife. 2022 Oct 13;11:e78278. doi: 10.7554/eLife.78278 (PMC9633061; doi:10.7554/eLife.78278)
Supplement: Figure 3—source data 1. [file elife-78278-fig3-data1.xlsx]

## Sheet: Fig4A_ChutPurr_Gen_Hit_FA
probability(Hit)
	Session-1	Session-2	Session-3
GP-1	0.590909	0.885041	0.909722
GP-2	NaN	0.953333	NaN
GP-3	0.846154	0.887255	0.850694
GP-4	0.77037	0.875833	0.906765
Mean	0.735811	0.900366	0.88906
probability(FA)
	Session-1	Session-2	Session-3
GP-1	0.111111	0.370915	0.3125
GP-2	NaN	0.388889	NaN
GP-3	0.428571	0.394231	0.368132
GP-4	0.727778	0.442857	0.497436
Mean	0.422487	0.399223	0.392689

## Sheet: Fig4B_ChutPurr_Gen_dPrime
d'
ANIMAL DATA
	Session-1	Session-2	Session-3
GP-1	1.45052	1.5516	1.94696
GP-2	NaN	2.1494	NaN
GP-3	1.20009	1.55504	1.3951
GP-4	0.0631879	1.63111	1.63408
Mean	0.9046	1.72179	1.65871
MODEL DATA
Run-1	2.08494
Run-2	1.95604
Run-3	1.59704
Run-4	2.47596
Run-5	2.18678

## Sheet: Fig4C_WheekWhine_Gen_Hit_FA
probability(Hit)
	Session-1	Session-2	Session-3
GP-1	0.908043	0.886304	NaN
GP-2	0.619048	0.803571	0.786199
GP-3	0.619048	0.803571	0.786199
GP-4	0.849265	0.9325	0.97119
Mean	0.748851	0.856487	0.847863
probability(FA)
	Session-1	Session-2	Session-3
GP-1	0.444118	0.288235	NaN
GP-2	0.473684	0.419408	0.295031
GP-3	0.473684	0.419408	0.295031
GP-4	0.571429	0.5	0.694444
Mean	0.490729	0.406763	0.428169

## Sheet: Fig4D_WheekWhine_Gen_dPrime
d'
ANIMAL DATA
	Session-1	Session-2	Session-3
GP-1	1.78328	2.14481	NaN
GP-2	0.368992	1.08241	1.33442
GP-3	0.368992	1.08241	1.33442
GP-4	0.859612	1.73835	1.4438
Mean	0.845219	1.512	1.37088
MODEL DATA
Run-1	3.11031
Run-2	2.92641
Run-3	2.47596
Run-4	2.57944
Run-5	2.58988
