# Supplementary material for: Vocalization categorization behavior explained by a feature-based auditory categorization model
Source: eLife. 2022 Oct 13;11:e78278. doi: 10.7554/eLife.78278 (PMC9633061; doi:10.7554/eLife.78278)
Supplement: Figure 4—source data 1. [file elife-78278-fig4-data1.xlsx]

## Sheet: Fig5A_ChutPurr_SNR_Hit_FA
probability(Hit)
	SNR -18	SNR -12	SNR -6	SNR -3	SNR 0	SNR 3	SNR 6	SNR 12	CLEAN
GP-1	0.606061	0.848485	0.861111	0.9375	0.909091	0.868421	0.99	0.897436	0.969697
GP-2	0.758621	0.5	0.78125	0.916667	0.962963	0.978261	0.945455	0.842857	0.99
GP-3	0.818182	0.759259	0.901961	0.752809	0.807692	0.824742	0.746479	0.932432	0.95
GP-4	0.631579	0.583333	0.720588	0.854839	0.5625	0.941176	0.821429	0.907692	0.99
probability(FA)
	SNR -18	SNR -12	SNR -6	SNR -3	SNR 0	SNR 3	SNR 6	SNR 12	CLEAN
GP-1	0.555556	0.357143	0.2	0.439024	0.25	0.176471	0.333333	0.242424	0.185185
GP-2	0.83871	0.25	0.607143	0.48	0.459459	0.515152	0.382979	0.317073	0.210526
GP-3	0.666667	0.461538	0.717949	0.285714	0.511628	0.388889	0.142857	0.391304	0.3
GP-4	0.534884	0.5	0.411765	0.375	0.26087	0.25641	0.159091	0.111111	0.386364

## Sheet: Fig5B_ChutPurr_SNR_dPrime
d'
ANIMAL DATA
	SNR -18	SNR -12	SNR -6	SNR -3	SNR 0	SNR 3	SNR 6	SNR 12	CLEAN
GP-1	0.129356	1.39606	1.92695	1.68756	2.00967	2.04786	2.75708	1.9656	2.77214
GP-2	-0.287296	0.67449	0.504542	1.43315	1.88795	1.9811	1.89996	1.48217	3.13094
GP-3	0.477731	0.80048	0.716047	1.2493	0.840273	1.21581	1.73102	1.77008	2.16925
GP-4	0.248486	0.210428	0.807598	1.37605	0.797978	2.21918	1.91902	2.54732	2.61516
MODEL DATA
	SNR -18	SNR -12	SNR -6	SNR -3	SNR 0	SNR 3	SNR 6	SNR 12	CLEAN
Run-1	0	0	0.927837	1.68324	2.12317	2.9964	2.89455	2.28115	2.08494
Run-2	0	1.11834	0.786879	1.16026	1.56083	1.43938	1.60908	2.08494	1.95604
Run-3	0	1.00876	1.12045	1.29538	2.28115	1.77621	2.18678	1.43938	1.59704
Run-4	0	0.889439	0.566297	1.51083	0.863608	1.43938	1.45899	1.86918	2.47596
Run-5	0.157655	0	0.660467	0.642881	0.755415	1.38835	1.19552	2.48647	2.18678

## Sheet: Fig5C_WheekWhine_SNR_Hit_FA
probability(Hit)
	SNR -9	SNR -6	SNR -3	SNR -1.5	SNR 0	SNR 1.5	SNR 3	SNR 6	SNR 20
GP-1
GP-2
GP-3
GP-4
probability(FA)
	SNR -9	SNR -6	SNR -3	SNR -1.5	SNR 0	SNR 1.5	SNR 3	SNR 6	SNR 20
GP-1
GP-2
GP-3
GP-4
probability(Hit)
	SNR -18	SNR -12	SNR -6	SNR -3	SNR 0	SNR 3	SNR 6	SNR 12	CLEAN
GP-1	0.83908	0.945055	0.946237	0.918367	0.98	0.975	0.99	0.967742	0.969388
GP-2	0.746667	0.821918	0.959459	0.866667	0.835616	0.815789	0.90411	0.84375	0.941176
GP-3	0.776	0.895522	0.92623	0.900901	0.941667	0.953846	0.891667	0.905172	0.891473
GP-4	0.6	0.827586	0.752137	0.807018	0.836066	0.837607	0.951613	0.960317	0.92437
probability(FA)
	SNR -18	SNR -12	SNR -6	SNR -3	SNR 0	SNR 3	SNR 6	SNR 12	CLEAN
GP-1	0.873016	0.779661	0.54386	0.442308	0.6	0.514286	0.490909	0.448276	0.307692
GP-2	0.733333	0.404255	0.173913	0.133333	0.191489	0.2	0.489362	0.326923	0.384615
GP-3	0.666667	0.636364	0.5	0.348315	0.4375	0.371429	0.2875	0.238095	0.112676
GP-4	0.694118	0.576471	0.428571	0.418605	0.333333	0.325301	0.486842	0.405405	0.271605

## Sheet: Fig5D_WheekWhine_SNR_dPrime
d'
ANIMAL DATA
	SNR -18	SNR -12	SNR -6	SNR -3	SNR 0	SNR 3	SNR 6	SNR 12	CLEAN
GP-1	-0.150078	0.827638	1.49925	1.53929	1.8004	1.92415	2.34914	1.97861	2.37427
GP-2	0.0411112	1.16505	2.68326	2.22154	1.84902	1.74106	1.332	1.45842	1.85811
GP-3	0.328026	0.907688	1.44827	1.67658	1.72623	2.01142	1.79614	2.02404	2.44682
GP-4	-0.254209	0.751797	0.861242	1.07242	1.40914	1.4376	1.69369	1.99376	2.04306
MODEL DATA
	SNR -18	SNR -12	SNR -6	SNR -3	SNR 0	SNR 3	SNR 6	SNR 12	CLEAN
Run-1	0	0.897002	1.46899	2.58988	2.57944	2.4319	2.47596	2.21614	3.11031
Run-2	0.403098	0.629754	2.9964	1.59704	2.92641	2.72108	2.31798	2.3007	2.92641
Run-3	0.387859	2.24261	2.89455	2.47596	1.56519	2.08494	2.80159	2.7952	2.47596
Run-4	0.683791	1.69288	1.97102	2.18678	3.28971	2.4319	2.18678	2.18678	2.57944
Run-5	1.40721	2.12317	2.3007	2.87906	2.72108	2.58988	2.31798	2.7952	2.58988
