# Supplementary material for: Vocalization categorization behavior explained by a feature-based auditory categorization model
Source: eLife. 2022 Oct 13;11:e78278. doi: 10.7554/eLife.78278 (PMC9633061; doi:10.7554/eLife.78278)
Supplement: Figure 5—source data 1. [file elife-78278-fig5-data1.xlsx]

## Sheet: Fig7BChutPurrTChunkHitFA
probability(Hit)
	50	75	100	125	150	175	200	300	400	500	600	700	800
GP-1	0.8	0.85	0.7	0.875	0.9	0.9	0.9	0.85	0.95	0.9	0.975	0.925	0.95
GP-2	0.525	0.7	0.65	0.75	0.8	0.775	0.65	0.625	0.8	0.65	0.8	0.725	0.7
GP-3	0.825	0.875	0.675	0.925	0.925	0.95	0.875	0.9	0.925	0.95	0.975	0.975	0.99
probability(FA)
	50	75	100	125	150	175	200	300	400	500	600	700	800
GP-1	0.4	0.325	0.15	0.525	0.35	0.475	0.325	0.15	0.15	0.225	0.2	0.275	0.275
GP-2	0.475	0.325	0.025	0.35	0.35	0.4	0.325	0.2	0.175	0.2	0.025	0.2	0.075
GP-3	0.575	0.5	0.175	0.475	0.325	0.575	0.175	0.175	0.175	0.275	0.3	0.3	0.175

## Sheet: Fig7CChutPurrTChunkDPrime
d'
ANIMAL DATA
	50	75	100	125	150	175	200	300	400	500	600	700	800
GP-1	1.09497	1.4902	1.56083	1.08764	1.66687	1.34426	1.73531	2.07287	2.68129	2.03697	2.80159	2.03729	2.24261
GP-2	0.125414	0.978163	2.34528	1.05981	1.22694	1.00876	0.839083	1.16026	1.77621	1.22694	2.80159	1.43938	1.96393
GP-3	0.745471	1.15035	1.38835	1.50224	1.89329	1.45574	2.08494	2.21614	2.37412	2.24261	2.48436	2.48436	3.26094
MODEL DATA
	50	75	100	125	150	175	200	300	400	500	600	700	800
Run-1	0.264644	0.522982	0.179174	0.841771	0.800151	0.871883	1.16209	1.21306	1.87805	1.77621	1.59704	1.77621	1.99197
Run-2	0	0	0.21576	0.346962	0.765042	1.15589	0.871883	1.45899	1.12371	2.12317	2.47596	1.60908	1.90576
Run-3	0	0	0.113916	0.818122	0.881076	1.4299	2.08494	1.22694	2.08494	2.08494	2.63445	1.69	1.99197
Run-4	0	1.68324	0	0.394934	1.51919	1.15589	1.29538	3.3995	1.60908	1.97102	2.08494	1.59704	2.37412
Run-5	0	0.113916	1.56519	1.74811	1.25323	1.73531	1.12825	1.27225	1.77621	2.71538	2.16925	1.87805	1.86918

## Sheet: Fig7EWheekWhineTChunkHitFA
probability(Hit)
	50	75	100	125	150	175	200	300	400	500	600	700	800
GP-1	0.457143	0.771429	0.657143	0.8	0.942857	0.771429	0.857143	0.885714	0.857143	0.942857	0.942857	0.942857	0.971429
GP-2	0.542857	0.6	0.742857	0.685714	0.914286	0.99	0.885714	0.942857	0.914286	0.942857	0.942857	0.971429	0.942857
GP-3	0.571429	0.857143	0.742857	0.828571	0.828571	0.99	0.99	0.99	0.971429	0.971429	0.942857	0.971429	0.971429
probability(FA)
	50	75	100	125	150	175	200	300	400	500	600	700	800
GP-1	0.2	0.2	0.4	0.142857	0.171429	0.371429	0.2	0.342857	0.314286	0.314286	0.4	0.4	0.314286
GP-2	0.257143	0.228571	0.0571429	0.171429	0.2	0.171429	0.285714	0.2	0.257143	0.314286	0.171429	0.285714	0.4
GP-3	0.285714	0.171429	0.257143	0.257143	0.171429	0.342857	0.228571	0.257143	0.314286	0.285714	0.314286	0.342857	0.314286

## Sheet: Fig7FWheekWhineTChunkDPrime
d'
ANIMAL DATA
	50	75	100	125	150	175	200	300	400	500	600	700	800
GP-1	0.733987	1.58518	0.658025	1.90919	2.52775	1.07163	1.90919	1.60872	1.55131	2.06296	1.83257	1.83257	2.38596
GP-2	0.759813	0.996907	2.2314	1.43227	2.20925	3.27488	1.77	2.42084	2.01981	2.06296	2.52775	2.46817	1.83257
GP-3	0.745961	2.01611	1.30436	1.60071	1.89707	2.73103	3.06991	2.97853	2.38596	2.46817	2.06296	2.30689	2.38596
MODEL DATA
	50	75	100	125	150	175	200	300	400	500	600	700	800
Run-1	0	0	0.375173	0	0.300057	0	0.927041	2.46817	2.94685	2.78327	2.94685	2.42084	2.94685
Run-2	0.255512	0.737598	0	1.09548	1.25999	1.90729	2.64679	3.69398	3.53039	3.53039	2.2314	2.11119	2.73526
Run-3	0.624068	0.953681	0.630684	0.324011	1.02403	1.23986	1.75923	1.94761	2.94685	2.73526	2.94685	3.10626	3.26984
Run-4	0.362426	0.801679	0.737598	1.33627	0.799369	0.720308	0.9507	2.78327	2.52775	2.31616	2.78327	2.94685	3.39392
Run-5	0.211592	1.05617	0.737086	1.02403	1.47159	1.61504	2.15258	2.27162	2.78327	3.27488	3.26984	2.31616	3.48144
