# Supplementary material for: Vocalization categorization behavior explained by a feature-based auditory categorization model
Source: eLife. 2022 Oct 13;11:e78278. doi: 10.7554/eLife.78278 (PMC9633061; doi:10.7554/eLife.78278)
Supplement: Figure 6—source data 1. [file elife-78278-fig6-data1.xlsx]

## Sheet: Fig6BChutPurrTempoShiftHitFA
probability(Hit)
	0.454545	0.5	0.555556	0.625	0.769231	1	1.42857	2.5	5
GP-1	0.85	0.725	0.925	0.9	0.9	0.99	0.875	0.925	0.8
GP-2	0.85	0.825	0.85	0.9	0.975	0.85	0.9	0.925	0.675
GP-3	0.925	0.975	0.95	0.85	0.925	0.9125	0.95	0.975	0.99
GP-4	0.725	0.8	0.875	0.925	0.925	0.938776	0.875	0.875	0.85
probability(FA)
	0.454545	0.5	0.555556	0.625	0.769231	1	1.42857	2.5	5
GP-1	0.05	0.225	0.175	0.125	0.1	0.125	0.15	0.125	0.2
GP-2	0.125	0.125	0.1	0.125	0.075	0.2	0.2	0.275	0.425
GP-3	0.225	0.225	0.175	0.15	0.2	0.2375	0.325	0.4	0.625
GP-4	0.225	0.3	0.25	0.275	0.25	0.23913	0.35	0.475	0.65

## Sheet: Fig6CChutPurrTempoShiftDPrime
d'
ANIMAL DATA
	0.454545	0.5	0.555556	0.625	0.769231	1	1.42857	2.5	5
GP-1	2.68129	1.35318	2.37412	2.4319	2.5631	3.4767	2.18678	2.58988	1.68324
GP-2	2.18678	2.08494	2.31798	2.4319	3.3995	1.87805	2.12317	2.03729	0.642881
GP-3	2.19495	2.71538	2.57944	2.07287	2.28115	2.21789	2.09862	2.21331	2.00771
GP-4	1.35318	1.36602	1.82484	2.03729	2.11402	2.25368	1.53567	1.21306	0.651113
MODEL DATA
	0.454545	0.5	0.555556	0.625	0.769231	1	1.42857	2.5	5
Run-1	1.36602	1.05152	3.60482	1.27225	2.72108	2.28115	2.03697	1.89329	2.03697
Run-2	0.993129	0.67449	1.12216	1.29538	1.0488	2.3007	1.35318	2.47596	1.87805
Run-3	0.983081	1.51611	1.51919	1.67475	2.57969	1.4299	2.03697	2.21614	1.77621
Run-4	1.22555	2.63445	1.4299	2.28115	2.68129	2.18678	2.57944	2.57944	2.18678
Run-5	0.681242	1.77621	2.68129	1.99197	2.57944	2.40027	1.79185	2.57944	2.21614

## Sheet: Fig6EWheekWhineTempoShiftHitFA
probability(Hit)
	0.454545	0.5	0.555556	0.625	0.769231	1	1.42857	2.5	5
GP-1	0.857143	0.828571	0.828571	0.857143	0.828571	0.942857	0.885714	0.942857	0.857143
GP-2	0.914286	0.971429	0.8	0.914286	0.942857	0.885714	0.971429	0.99	0.99
GP-3	0.828571	0.885714	0.885714	0.8	0.885714	0.942857	0.942857	0.885714	0.914286
probability(FA)
	0.454545	0.5	0.555556	0.625	0.769231	1	1.42857	2.5	5
GP-1	0.2	0.0571429	0.0571429	0.114286	0.114286	0.114286	0.228571	0.285714	0.142857
GP-2	0.2	0.171429	0.142857	0.2	0.142857	0.0857143	0.114286	0.171429	0.2
GP-3	0.171429	0.0571429	0.114286	0.0571429	0.114286	0.0857143	0.0857143	0.114286	0.142857

## Sheet: Fig6FWheekWhineTempoShiftDPrime
d'
ANIMAL DATA
	0.454545	0.5	0.555556	0.625	0.769231	1	1.42857	2.5	5
GP-1	1.90919	2.52775	2.52775	2.27162	2.15258	2.78327	1.94761	2.14517	2.13514
GP-2	2.20925	2.85075	1.90919	2.20925	2.64679	2.57167	3.10626	3.27488	3.16797
GP-3	1.89707	2.78327	2.40809	2.42084	2.40809	2.94685	2.94685	2.40809	2.4352
MODEL DATA
	0.454545	0.5	0.555556	0.625	0.769231	1	1.42857	2.5	5
Run-1	2.2314	3.15844	3.90557	2.27162	2.94685	3.24152	2.57167	2.27162	2.73526
Run-2	1.94761	2.57167	2.27162	2.27162	3.80443	2.72108	2.42084	2.01611	4
Run-3	2.5544	2.31616	2.64679	2.78327	2.15258	2.5631	2.57167	2.73526	2.04567
Run-4	2.73526	2.64679	3.26984	1.93358	2.04567	1.53567	2.96979	2.15258	2.40809
Run-5	2.94685	2.15258	2.73526	2.40809	2.94685	2.58988	2.31616	2.15258	2.4352
