# Supplementary material for: Vocalization categorization behavior explained by a feature-based auditory categorization model
Source: eLife. 2022 Oct 13;11:e78278. doi: 10.7554/eLife.78278 (PMC9633061; doi:10.7554/eLife.78278)
Supplement: Figure 7—source data 1. [file elife-78278-fig7-data1.xlsx]

## Sheet: Fig8A_ChutPurr_ISI_dist
ISI_Chuts		ISI_Purrs
0.0256813		0.0186521
0.190305		0.0146552
0.0276568		0.0173198
0.217962		0.0159875
0.0579476		0.0213167
0.158151		0.0226489
0.188847		0.0226489
0.203528		0.0253135
0.0240229		0.0233151
0.0332677		0.0233151
0.169		0.0253135
0.144382		0.0286443
0.161681		0.0286443
0.145945		0.0259797
0.137321		0.0233151
0.230195		0.020085
0.0371497		0.0212009
0.0292574		0.0228746
0.127669		0.0245484
0.129664		0.0262221
0.0997412		0.0278959
0.0418913		0.0239905
0.0299224		0.0251063
0.039855		0.0256642
0.0537438		0.0256642
0.261473		0.0256642
0.0404588		0.0262221
0.148618		0.02678
0.179413		0.0207771
0.152635		0.0254687
0.154643		0.0221176
0.131146		0.0221176
0.132727		0.0227878
0.188556		0.0214473
		0.0207771
		0.0227878
		0.0254687
		0.0221176
		0.0187664
		0.0241283
		0.0227878
		0.0194367
		0.0201069
		0.0247985
		0.0214473
		0.0196977
		0.0304419
		0.0286512
		0.0316357
		0.0292481
		0.0262636
		0.0310388
		0.0244729
		0.0274574
		0.023876
		0.0364108
		0.0273113
		0.0233146
		0.0253129
		0.0286436
		0.0293097
		0.0273113
		0.0293097
		0.0293097
		0.0286436
		0.0259791
		0.0353049
		0.0299759
		0.0339726
		0.0299759
		0.0379694
		0.0281138
		0.0294526
		0.0307913
		0.0261057
		0.0207507
		0.0247669
		0.0240975
		0.0287832
		0.0247669
		0.0240975
		0.0307913
		0.0274444
		0.0301219
		0.0341382
		0.0337791
		0.0344415
		0.0370908
		0.0337791
		0.0344415
		0.0351038
		0.0317921
		0.0331168
		0.0377531
		0.0364285
		0.0377531
		0.0384155
		0.026244
		0.0257084
		0.0310644
		0.0241017
		0.0187457
		0.0342779
		0.0460609
		0.0546304

## Sheet: Fig8BChutPurrSwitchISI
probability(Go)
	Normal chut	Chut syllable with purr ISI	Normal purr	Purr syllable with chut ISI
GP-1	0.9325	0.91	0.1925	0.16
GP-2	0.9425	0.905	0.205	0.23
GP-3	0.9875	0.94	0.235	0.085

## Sheet: Fig8CChutPurrRandSil_ISIHitFA
probability(Hit)
	Regular Calls	Random ISI	Silent ISI
GP-1	0.9625	0.89375	0.94
GP-2	0.94375	0.90625	0.96
GP-3	0.93125	0.8625	0.88
probability(FA)
	Regular Calls	Random ISI	Silent ISI
GP-1	0.31875	0.14375	0.305
GP-2	0.33125	0.16875	0.225
GP-3	0.31875	0.18125	0.18

## Sheet: Fig8DChutPurrRandSil_ISIDPrime
d'
ANIMAL DATA
	Regular Calls	Random ISI	Silent ISI
GP-1	2.25166	2.31034	2.06485
GP-2	2.02352	2.27713	2.5061
GP-3	1.95636	2.00223	2.09035
MODEL DATA
	Regular Calls	Random ISI	Silent ISI
Run-1	1.77621	1.68477	2.31934
Run-2	1.79185	0.20078	0.889439
Run-3	1.51611	1.44515	2.07287
Run-4	2.47596	1.79421	2.58988
Run-5	2.71538	1.85064	1.63419

## Sheet: Fig8E_WheekWhine_ISI_dist
ISI_Wheeks		ISI_Whines
0.18692		0.0830115
0.18692		0.109101
0.0270519		0.0758962
0.148786		0.153992
0.180346		0.015177
0.097619		0.177065
0.138827		0.174535
0.114793		0.010118
0.0976959		0.00625206
0.165621		0.137545
0.0835594		0.204929
		0.0826661
		0.0300249
		0.102942
		0.00857853
		0.017755
		0.0112986
		0.00968455
		0.0314748
		0.0104916
		0.187235
		0.0104916
		0.00887751
		0.128963
		0.180684
		0.0242381
		0.112377
		0.0110173
		0.0154243

## Sheet: Fig8FWheekWhineSwitchISI
probability(Go)
	Normal wheek	Wheek syllable with whine ISI	Normal whine	Whine syllable with wheek ISI
GP-1	0.92	0.84	0.1575	0.135
GP-2	0.9375	0.91	0.1175	0.095
GP-3	0.9775	0.97	0.1425	0.085

## Sheet: Fig8GWheekWhineRandSil_ISIHitFA
probability(Hit)
	Regular Calls	Random ISI	Silent ISI
GP-1	0.93125	0.86875	0.915
GP-2	0.8875	0.78125	0.84
GP-3	0.91875	0.9	0.91
probability(FA)
	Regular Calls	Random ISI	Silent ISI
GP-1	0.16875	0.23125	0.175
GP-2	0.10625	0.0875	0.03
GP-3	0.18125	0.0875	0.11

## Sheet: Fig8HWheekWhineRandSilISIDPrime
d'
ANIMAL DATA
	Regular Calls	Random ISI	Silent ISI
GP-1	2.44428	1.85524	2.30679
GP-2	2.46006	2.13273	2.87525
GP-3	2.30732	2.63786	2.56728
MODEL DATA
	Regular Calls	Random ISI	Silent ISI
Run-1	2.92641	2.20847	3.3995
Run-2	2.37412	2.1522	2.92641
Run-3	2.72108	2.54111	2.5631
Run-4	2.21614	1.40721	1.67475
Run-5	2.37412	2.12085	3.08439
