# Supplementary material for: Vocalization categorization behavior explained by a feature-based auditory categorization model
Source: eLife. 2022 Oct 13;11:e78278. doi: 10.7554/eLife.78278 (PMC9633061; doi:10.7554/eLife.78278)
Supplement: Figure 8—source data 1. [file elife-78278-fig8-data1.xlsx]

## Sheet: Fig9BChutPurrRevHitFA
probability(Hit)
	Regular calls	Reversed Calls
GP-1	0.775	0.925
GP-2	0.99	0.95
GP-3	0.95	0.975
probability(FA)
	Regular calls	Reversed Calls
GP-1	0.125	0.1
GP-2	0.325	0.225
GP-3	0.25	0.275

## Sheet: Fig9CChutPurrRevDPrime
d'
ANIMAL DATA
	Regular calls	Reversed Calls
GP-1	1.90576	2.72108
GP-2	2.78011	2.40027
GP-3	2.31934	2.55772
MODEL DATA
	Regular calls	Reversed Calls
Run-1	2.08494	2.08494
Run-2	1.95604	0.818122
Run-3	1.59704	1.77621
Run-4	2.47596	1.60908
Run-5	2.18678	1.53235

## Sheet: Fig9EWheekWhineRevHitFA
probability(Hit)
	Regular calls	Reversed Calls
GP-1	0.95	0.8
GP-2	0.875	0.875
GP-3	0.975	0.775
probability(FA)
	Regular calls	Reversed Calls
GP-1	0.1	0.225
GP-2	0.125	0.15
GP-3	0.2	0.175

## Sheet: Fig9FWheekWhineRevDPrime
d'
ANIMAL DATA
	Regular calls	Reversed Calls
GP-1	2.92641	1.59704
GP-2	2.3007	2.18678
GP-3	2.80159	1.69
MODEL DATA
	Regular calls	Reversed Calls
Run-1	3.11031	1.87805
Run-2	2.92641	2.47596
Run-3	2.47596	3.08176
Run-4	2.57944	1.35318
Run-5	2.58988	2.48647
