# Supplementary material for: Vocalization categorization behavior explained by a feature-based auditory categorization model
Source: eLife. 2022 Oct 13;11:e78278. doi: 10.7554/eLife.78278 (PMC9633061; doi:10.7554/eLife.78278)
Supplement: Figure 9—source data 1. [file elife-78278-fig9-data1.xlsx]

## Sheet: Fig10BChutPurrPitchShiftHitFA
probability(Hit)
	-50	-40	-30	-20	0	20	40	50	100
GP-1	0.7	0.85	0.95	0.9	0.975	0.95	0.9	0.95	0.875
GP-2	0.8	0.875	0.975	0.925	0.85	0.975	0.825	0.825	0.825
GP-3	0.825	0.95	0.99	0.975	0.95	0.975	0.95	0.95	0.95
GP-4	0.675	0.625	0.8	0.9	0.925	0.875	0.875	0.9	0.725
probability(FA)
	-50	-40	-30	-20	0	20	40	50	100
GP-1	0.675	0.65	0.45	0.25	0.2	0.375	0.725	0.5	0.7
GP-2	0.45	0.325	0.325	0.2	0.2	0.3	0.45	0.575	0.275
GP-3	0.75	0.75	0.6	0.425	0.275	0.55	0.75	0.9	0.875
GP-4	0.6	0.65	0.575	0.275	0.375	0.375	0.775	0.775	0.675

## Sheet: Fig10CChutPurrPitchShiftDPrime
d'
ANIMAL DATA
	-50	-40	-30	-20	0	20	40	50	100
GP-1	0.0706383	0.651113	1.77051	1.95604	2.80159	1.96349	0.683791	1.64485	0.625949
GP-2	0.967283	1.60411	2.41373	2.28115	1.87805	2.48436	1.06025	0.745471	1.53235
GP-3	0.2601	0.970364	2.073	2.14908	2.24261	1.8343	0.970364	0.363302	0.494504
GP-4	0.200415	-0.0666811	0.652503	1.87931	1.75817	1.46899	0.394934	0.526137	0.143998
MODEL DATA
	-50	-40	-30	-20	0	20	40	50	100
Run-1	0.61595	0.179174	1.63419	1.87805	2.31798	1.77621	0.985769	1.39151	1.87805
Run-2	0	0	0.0629546	2.58988	2.57944	0.851107	0	0.157655	0
Run-3	0.60842	0.220728	2.80159	2.08494	1.27225	1.27225	1.67475	0.783086	1.67475
Run-4	1.35318	0.196202	1.4299	3.9712	2.92641	0.983081	0.35585	1.09914	0
Run-5	0.506694	1.19889	0.927837	1.69	2.21614	1.69288	1.43938	1.34426	1.74811

## Sheet: Fig10EWheekWhinePitchShiftHitFA
probability(Hit)
	-50	-40	-30	-20	0	20	40	50	100
GP-1	0.625	0.775	0.9	0.85	0.875	0.825	0.75	0.775	0.825
GP-2	0.7	0.7	0.7	0.825	0.9	0.925	0.95	0.975	0.95
GP-3	0.675	0.775	0.85	0.85	0.875	0.875	0.9	0.875	0.975
probability(FA)
	-50	-40	-30	-20	0	20	40	50	100
GP-1	0.225	0.075	0.125	0.175	0.125	0.325	0.325	0.45	0.525
GP-2	0.25	0.3	0.125	0.175	0.175	0.325	0.525	0.725	0.625
GP-3	0.2	0.125	0.075	0.075	0.1	0.3	0.375	0.425	0.575

## Sheet: 10FWheekWhinePitchShiftDPrime
d'
ANIMAL DATA
	-50	-40	-30	-20	0	20	40	50	100
GP-1	1.07405	2.19495	2.4319	1.97102	2.3007	1.38835	1.12825	0.881076	0.871883
GP-2	1.19889	1.0488	1.67475	1.86918	2.21614	1.89329	1.58215	1.3622	1.32621
GP-3	1.29538	1.90576	2.47596	2.47596	2.4319	1.67475	1.60019	1.33947	1.77085
MODEL DATA
	-50	-40	-30	-20	0	20	40	50	100
Run-1	0.934589	1.45574	1.46899	2.03697	3.3995	1.73531	1.35507	1.46899	1.80595
Run-2	0.43993	1.15589	1.60411	2.47596	2.19495	1.67475	1.71092	1.70756	2.09862
Run-3	0	0.710264	1.12089	0.997296	2.92641	2.89455	1.99197	3.24152	0.967283
Run-4	2.073	1.12089	1.77051	1.96393	2.12317	1.60411	1.71092	2.2786	0.231015
Run-5	1.28155	1.40721	2.58988	2.92641	1.99197	1.18618	0.582671	0.757151	0
