# Supplementary material for: Vocalization categorization behavior explained by a feature-based auditory categorization model
Source: eLife. 2022 Oct 13;11:e78278. doi: 10.7554/eLife.78278 (PMC9633061; doi:10.7554/eLife.78278)
Supplement: Figure 10—source data 1. [file elife-78278-fig10-data1.xlsx]

## Sheet: Fig11BWheekWhine3kLPHitFA
probability(Hit)
	Regular calls	Filtered Calls
GP-1	0.9625	0.75
GP-2	0.94375	0.575
GP-3	0.8875	0.025
probability(FA)
	Regular calls	Filtered Calls
GP-1	0.35625	0.175
GP-2	0.2	0.05
GP-3	0.1875	0.025

## Sheet: Fig11CWheekWhine3kLPDPrime
d'
ANIMAL DATA
	Regular calls	Filtered Calls
GP-1	2.14896	1.60908
GP-2	2.42868	1.83397
GP-3	2.10049	0
MODEL DATA
	Regular calls	Filtered Calls
Run-1	3.11031	2.40027
Run-2	2.92641	2.31798
Run-3	2.47596	1.68324
Run-4	2.57944	1.77621
Run-5	2.58988	2.31798
