# Supplementary material for: Vocalization categorization behavior explained by a feature-based auditory categorization model
Source: eLife. 2022 Oct 13;11:e78278. doi: 10.7554/eLife.78278 (PMC9633061; doi:10.7554/eLife.78278)
Supplement: Figure 12—source data 1. [file elife-78278-fig12-data1.xlsx]

## Sheet: chut_vs_purr_generalization
MIF_set_number	MIF_number	CF_kHz	BW_octave	Duration_ms	Relative_Detection_Rate
1	1	2.29951	5.23455	74	1
1	2	3.49506	3.01993	185	1
1	3	1.80126	6.14053	20	1
1	4	2.38115	6.14053	61	1
1	5	1.36258	1.7113	197	1
1	6	1.06734	2.61728	27	0
1	7	0.752987	1.4093	166	1
1	8	2	5.83854	140	1
1	9	1.7395	4.42924	66	1
1	10	2.14453	5.83854	19	1
1	11	2.14453	1.20797	178	1
1	12	2.14453	6.44253	105	1
1	13	2.73775	5.33522	12	1
1	14	1.36258	3.92592	30	1
1	15	2.29951	4.8319	109	1
1	16	0.349506	0.805316	133	1
1	17	4.78429	0.704651	9	1
1	18	1.93143	6.34186	94	1
1	19	1.51293	3.01993	100	1
1	20	1.51293	5.83854	26	1
2	1	1.67986	2.91927	188	1
2	2	2.07101	6.14053	99	0
2	3	2.46569	6.03987	164	1
2	4	0.779721	2.11395	63	1
2	5	2	5.03322	79	1
2	6	0.896489	4.12724	116	0
2	7	0.779721	3.1206	75	1
2	8	1.36258	4.5299	180	1
2	9	1.27075	4.73123	184	1
2	10	1.67986	5.33522	86	1
2	11	0.961276	2.71794	137	1
2	12	5.69607	3.62392	51	1
2	13	1.41096	3.01993	55	1
2	14	2.55323	5.13389	109	0
2	15	2	6.44253	126	1
2	16	1.86521	4.8319	34	1
2	17	1.10523	4.5299	161	1
2	18	1.22718	4.42924	86	1
2	19	1.18511	5.13389	1	0
2	20	1.51293	4.42924	119	1
3	1	0.995405	2.01329	51	1
3	2	3.61914	1.10731	167	1
3	3	1.80126	6.34186	195	1
3	4	0.513004	1.91263	85	0
3	5	1.14447	1.61063	97	1
3	6	1.10523	2.91927	109	1
3	7	2.73775	1.10731	179	1
3	8	1.93143	1.7113	139	1
3	9	2.22067	5.73788	68	1
3	10	1.46105	4.93256	142	1
3	11	1.80126	3.72459	157	1
3	12	3.61914	3.52326	153	1
3	13	1.93143	6.14053	82	0
3	14	1.18511	1.10731	182	1
3	15	0.928318	1.61063	54	1
3	16	2.46569	6.03987	32	1
3	17	0.961276	1.50997	26	1
3	18	2.38115	0.90598	105	1
3	19	2.14453	4.22791	9	1
3	20	2.46569	4.63057	129	1
4	1	1.36258	3.32193	124	1
4	2	2.55323	1.10731	171	1
4	3	2	6.03987	161	0
4	4	1.7395	5.03322	23	0
4	5	2.73775	5.53655	198	1
4	6	2.83495	5.03322	18	1
4	7	4.01847	2.21462	65	1
4	8	2.73775	5.33522	63	1
4	9	1.80126	5.9392	131	1
4	10	1.31587	2.41595	125	1
4	11	8.65752	2.41595	186	1
4	12	2.83495	4.8319	81	1
4	13	1.51293	5.23455	73	1
4	14	1.62226	5.83854	8	1
4	15	16.7986	0.100664	41	1
4	16	1.27075	3.52326	137	1
4	17	8.96489	2.31528	147	1
4	18	8.36069	1.30864	194	1
4	19	7.2717	1.7113	190	1
4	20	1.93143	5.53655	50	1
5	1	0.928318	2.41595	79	1
5	2	1.41096	5.63721	117	0
5	3	1.93143	6.34186	98	0
5	4	1.56664	1.91263	195	1
5	5	1.46105	2.91927	84	1
5	6	0.72717	2.31528	146	1
5	7	0.836069	1.30864	152	1
5	8	4.16114	2.51661	108	1
5	9	8.65752	2.01329	182	1
5	10	1.51293	5.23455	31	1
5	11	16.2226	0.603987	138	1
5	12	2.64388	5.63721	180	1
5	13	3.03982	0.402658	196	1
5	14	1.18511	0.301993	174	0
5	15	0.961276	2.71794	144	0
5	16	1.31587	0.402658	121	1
5	17	0.550078	1.10731	49	0
5	18	4.30887	1.61063	161	1
5	19	0.779721	3.1206	148	1
5	20	1.10523	2.51661	151	1

## Sheet: chut_vs_purr_snr
MIF_set_number	MIF_number	CF_kHz	BW_octave	Duration_ms	Relative_Detection_Rate
1	1	2.29951	5.23455	74	0.666667
1	2	3.49506	3.01993	185	0.111111
1	3	1.80126	6.14053	20	0.777778
1	4	2.38115	6.14053	61	0.666667
1	5	1.36258	1.7113	197	0.444444
1	6	1.06734	2.61728	27	0
1	7	0.752987	1.4093	166	0.666667
1	8	2	5.83854	140	0.666667
1	9	1.7395	4.42924	66	0.333333
1	10	2.14453	5.83854	19	0.777778
1	11	2.14453	1.20797	178	0.222222
1	12	2.14453	6.44253	105	0.444444
1	13	2.73775	5.33522	12	0.222222
1	14	1.36258	3.92592	30	0.555556
1	15	2.29951	4.8319	109	0.111111
1	16	0.349506	0.805316	133	0.777778
1	17	4.78429	0.704651	9	0.444444
1	18	1.93143	6.34186	94	0.444444
1	19	1.51293	3.01993	100	0.222222
1	20	1.51293	5.83854	26	0.222222
2	1	1.67986	2.91927	188	0.111111
2	2	2.07101	6.14053	99	0.444444
2	3	2.46569	6.03987	164	0.888889
2	4	0.779721	2.11395	63	0.777778
2	5	2	5.03322	79	0.666667
2	6	0.896489	4.12724	116	0
2	7	0.779721	3.1206	75	0.666667
2	8	1.36258	4.5299	180	0.666667
2	9	1.27075	4.73123	184	0.888889
2	10	1.67986	5.33522	86	0.222222
2	11	0.961276	2.71794	137	0.666667
2	12	5.69607	3.62392	51	0.111111
2	13	1.41096	3.01993	55	0.555556
2	14	2.55323	5.13389	109	0
2	15	2	6.44253	126	0.666667
2	16	1.86521	4.8319	34	0.444444
2	17	1.10523	4.5299	161	0.777778
2	18	1.22718	4.42924	86	0.555556
2	19	1.18511	5.13389	1	0.111111
2	20	1.51293	4.42924	119	0.111111
3	1	0.995405	2.01329	51	0.666667
3	2	3.61914	1.10731	167	0.111111
3	3	1.80126	6.34186	195	0.888889
3	4	0.513004	1.91263	85	0
3	5	1.14447	1.61063	97	0.222222
3	6	1.10523	2.91927	109	0.111111
3	7	2.73775	1.10731	179	0.111111
3	8	1.93143	1.7113	139	0.111111
3	9	2.22067	5.73788	68	0.888889
3	10	1.46105	4.93256	142	0.222222
3	11	1.80126	3.72459	157	0.333333
3	12	3.61914	3.52326	153	0.111111
3	13	1.93143	6.14053	82	0
3	14	1.18511	1.10731	182	0.111111
3	15	0.928318	1.61063	54	0.666667
3	16	2.46569	6.03987	32	0.666667
3	17	0.961276	1.50997	26	0.555556
3	18	2.38115	0.90598	105	0.111111
3	19	2.14453	4.22791	9	0.222222
3	20	2.46569	4.63057	129	0.444444
4	1	1.36258	3.32193	124	0.777778
4	2	2.55323	1.10731	171	0.111111
4	3	2	6.03987	161	0
4	4	1.7395	5.03322	23	0.111111
4	5	2.73775	5.53655	198	0.666667
4	6	2.83495	5.03322	18	0.111111
4	7	4.01847	2.21462	65	0.111111
4	8	2.73775	5.33522	63	0.777778
4	9	1.80126	5.9392	131	0.111111
4	10	1.31587	2.41595	125	0.444444
4	11	8.65752	2.41595	186	0.111111
4	12	2.83495	4.8319	81	0.111111
4	13	1.51293	5.23455	73	0.888889
4	14	1.62226	5.83854	8	0.777778
4	15	16.7986	0.100664	41	0.333333
4	16	1.27075	3.52326	137	0.777778
4	17	8.96489	2.31528	147	0.111111
4	18	8.36069	1.30864	194	0.111111
4	19	7.2717	1.7113	190	0.111111
4	20	1.93143	5.53655	50	0.777778
5	1	0.928318	2.41595	79	0.777778
5	2	1.41096	5.63721	117	0
5	3	1.93143	6.34186	98	0.333333
5	4	1.56664	1.91263	195	0.111111
5	5	1.46105	2.91927	84	0.666667
5	6	0.72717	2.31528	146	0.777778
5	7	0.836069	1.30864	152	0.444444
5	8	4.16114	2.51661	108	0.222222
5	9	8.65752	2.01329	182	0.111111
5	10	1.51293	5.23455	31	0.555556
5	11	16.2226	0.603987	138	0.111111
5	12	2.64388	5.63721	180	0.333333
5	13	3.03982	0.402658	196	0.111111
5	14	1.18511	0.301993	174	0.111111
5	15	0.961276	2.71794	144	0
5	16	1.31587	0.402658	121	0.111111
5	17	0.550078	1.10731	49	0
5	18	4.30887	1.61063	161	0.111111
5	19	0.779721	3.1206	148	0.777778
5	20	1.10523	2.51661	151	0.333333

## Sheet: chut_vs_purr_freqshift
MIF_set_number	MIF_number	CF_kHz	BW_octave	Duration_ms	Relative_Detection_Rate
1	1	2.29951	5.23455	74	0.333333
1	2	3.49506	3.01993	185	1
1	3	1.80126	6.14053	20	0.333333
1	4	2.38115	6.14053	61	0.111111
1	5	1.36258	1.7113	197	0.666667
1	6	1.06734	2.61728	27	0.555556
1	7	0.752987	1.4093	166	0.444444
1	8	2	5.83854	140	0.333333
1	9	1.7395	4.42924	66	0.444444
1	10	2.14453	5.83854	19	0.555556
1	11	2.14453	1.20797	178	0.777778
1	12	2.14453	6.44253	105	0.333333
1	13	2.73775	5.33522	12	0.666667
1	14	1.36258	3.92592	30	0.222222
1	15	2.29951	4.8319	109	0.222222
1	16	0.349506	0.805316	133	0.333333
1	17	4.78429	0.704651	9	0.111111
1	18	1.93143	6.34186	94	0.111111
1	19	1.51293	3.01993	100	0.666667
1	20	1.51293	5.83854	26	0.222222
2	1	1.67986	2.91927	188	0.555556
2	2	2.07101	6.14053	99	0.111111
2	3	2.46569	6.03987	164	0.111111
2	4	0.779721	2.11395	63	0.333333
2	5	2	5.03322	79	0.111111
2	6	0.896489	4.12724	116	0.111111
2	7	0.779721	3.1206	75	0.111111
2	8	1.36258	4.5299	180	0.111111
2	9	1.27075	4.73123	184	0.111111
2	10	1.67986	5.33522	86	0.222222
2	11	0.961276	2.71794	137	0.111111
2	12	5.69607	3.62392	51	0.555556
2	13	1.41096	3.01993	55	0.111111
2	14	2.55323	5.13389	109	0.111111
2	15	2	6.44253	126	0.111111
2	16	1.86521	4.8319	34	0.111111
2	17	1.10523	4.5299	161	0.333333
2	18	1.22718	4.42924	86	0.333333
2	19	1.18511	5.13389	1	0.444444
2	20	1.51293	4.42924	119	0.222222
3	1	0.995405	2.01329	51	0.555556
3	2	3.61914	1.10731	167	0.777778
3	3	1.80126	6.34186	195	0.222222
3	4	0.513004	1.91263	85	0.111111
3	5	1.14447	1.61063	97	0.555556
3	6	1.10523	2.91927	109	0.333333
3	7	2.73775	1.10731	179	0.888889
3	8	1.93143	1.7113	139	0.444444
3	9	2.22067	5.73788	68	0.555556
3	10	1.46105	4.93256	142	0.111111
3	11	1.80126	3.72459	157	0.111111
3	12	3.61914	3.52326	153	0.555556
3	13	1.93143	6.14053	82	0
3	14	1.18511	1.10731	182	0.666667
3	15	0.928318	1.61063	54	0.333333
3	16	2.46569	6.03987	32	0.222222
3	17	0.961276	1.50997	26	0.111111
3	18	2.38115	0.90598	105	0.111111
3	19	2.14453	4.22791	9	0.555556
3	20	2.46569	4.63057	129	0.222222
4	1	1.36258	3.32193	124	0.444444
4	2	2.55323	1.10731	171	0.777778
4	3	2	6.03987	161	0.111111
4	4	1.7395	5.03322	23	0.333333
4	5	2.73775	5.53655	198	0.222222
4	6	2.83495	5.03322	18	0.111111
4	7	4.01847	2.21462	65	0.444444
4	8	2.73775	5.33522	63	0.666667
4	9	1.80126	5.9392	131	0.444444
4	10	1.31587	2.41595	125	0.111111
4	11	8.65752	2.41595	186	0.777778
4	12	2.83495	4.8319	81	0.111111
4	13	1.51293	5.23455	73	0.111111
4	14	1.62226	5.83854	8	0.444444
4	15	16.7986	0.100664	41	0.333333
4	16	1.27075	3.52326	137	0.444444
4	17	8.96489	2.31528	147	0.888889
4	18	8.36069	1.30864	194	0.555556
4	19	7.2717	1.7113	190	0.666667
4	20	1.93143	5.53655	50	0.777778
5	1	0.928318	2.41595	79	0.666667
5	2	1.41096	5.63721	117	0.111111
5	3	1.93143	6.34186	98	0.222222
5	4	1.56664	1.91263	195	1
5	5	1.46105	2.91927	84	0.444444
5	6	0.72717	2.31528	146	0.333333
5	7	0.836069	1.30864	152	0.222222
5	8	4.16114	2.51661	108	0.222222
5	9	8.65752	2.01329	182	0.666667
5	10	1.51293	5.23455	31	0.222222
5	11	16.2226	0.603987	138	0.333333
5	12	2.64388	5.63721	180	0.111111
5	13	3.03982	0.402658	196	0.555556
5	14	1.18511	0.301993	174	0.222222
5	15	0.961276	2.71794	144	0
5	16	1.31587	0.402658	121	0.333333
5	17	0.550078	1.10731	49	0
5	18	4.30887	1.61063	161	0.666667
5	19	0.779721	3.1206	148	0.111111
5	20	1.10523	2.51661	151	0.111111

## Sheet: purr_vs_chut_generalization
MIF_set_number	MIF_number	CF_kHz	BW_octave	Duration_ms	Relative_Detection_Rate
1	1	1.46105	2.51661	147	1
1	2	1.56664	3.52326	85	1
1	3	2.38115	3.52326	83	1
1	4	2.14453	3.22126	97	1
1	5	1.14447	1.61063	62	1
1	6	1.18511	0.301993	174	1
1	7	1.62226	2.81861	29	1
1	8	2.14453	3.62392	49	1
2	1	1.62226	2.61728	34	1
2	2	1.03074	0.90598	78	1
2	3	1.18511	1.91263	86	1
2	4	3.37522	4.93256	164	1
2	5	1.93143	3.32193	71	1
2	6	2.38115	3.32193	45	1
2	7	0.752987	1.61063	55	1
2	8	3.49506	4.02658	140	1
2	9	1.51293	2.81861	78	1
3	1	2.14453	3.82525	76	1
3	2	1.51293	2.41595	125	1
3	3	1.46105	1.50997	189	1
3	4	1.18511	1.91263	113	1
3	5	2.46569	4.42924	52	1
3	6	1.93143	3.52326	89	1
3	7	2.83495	4.02658	157	1
3	8	1.86521	3.22126	13	1
3	9	2.73775	4.5299	157	1
3	10	0.961276	0.503322	148	1
3	11	2.9356	5.33522	162	1
3	12	2.22067	2.71794	139	1
3	13	2.38115	4.32857	88	1
3	14	0.550078	1.10731	49	1
3	15	1.31587	1.4093	85	1
3	16	3.49506	3.01993	185	1
3	17	3.61914	4.73123	169	1
3	18	1.7395	2.61728	83	1
3	19	3.49506	2.01329	131	1
3	20	4.30887	4.22791	105	0
4	1	1.06734	1.20797	166	1
4	2	3.03982	4.42924	139	1
4	3	2.14453	3.62392	33	1
4	4	1.56664	3.32193	190	1
4	5	2.55323	4.32857	70	1
4	6	2.64388	4.02658	109	1
4	7	1.03074	2.31528	177	1
4	8	1.03074	2.11395	53	1
4	9	1.18511	1.10731	182	1
4	10	4.16114	4.32857	130	1
4	11	2	3.82525	161	1
4	12	2.22067	2.31528	163	1
4	13	1.36258	2.51661	187	1
4	14	3.2595	4.02658	38	1
4	15	1.51293	0.402658	63	1
4	16	2.07101	1.10731	85	1
4	17	2.83495	4.63057	157	1
4	18	2.46569	6.03987	32	1
4	19	2.73775	4.93256	85	1
4	20	3.74763	4.63057	90	1
5	1	2.46569	4.63057	105	1
5	2	1.67986	3.72459	133	1
5	3	2.55323	3.52326	29	1
5	4	1.27075	2.71794	118	1
5	5	1.46105	1.7113	97	1
5	6	2	3.22126	4	1
5	7	3.2595	5.03322	54	1
5	8	2.83495	4.42924	9	1
5	9	1.46105	3.1206	28	1
5	10	4.78429	2.31528	64	0
5	11	1.56664	3.1206	170	1
5	12	1.36258	1.7113	197	1
5	13	2.46569	5.23455	26	1
5	14	1.80126	3.1206	127	1
5	15	2.14453	3.62392	5	1
5	16	3.74763	4.63057	158	1
5	17	2.64388	4.42924	84	1
5	18	1.62226	1.81196	175	1
5	19	2.83495	5.63721	120	1
5	20	2.55323	4.12724	9	1

## Sheet: purr_vs_chut_snr
MIF_set_number	MIF_number	CF_kHz	BW_octave	Duration_ms	Relative_Detection_Rate
1	1	1.46105	2.51661	147	0.444444
1	2	1.56664	3.52326	85	0.777778
1	3	2.38115	3.52326	83	0.222222
1	4	2.14453	3.22126	97	0.222222
1	5	1.14447	1.61063	62	0.555556
1	6	1.18511	0.301993	174	0.222222
1	7	1.62226	2.81861	29	0.555556
1	8	2.14453	3.62392	49	0.444444
2	1	1.62226	2.61728	34	0.222222
2	2	1.03074	0.90598	78	0.666667
2	3	1.18511	1.91263	86	0.777778
2	4	3.37522	4.93256	164	0.444444
2	5	1.93143	3.32193	71	0.333333
2	6	2.38115	3.32193	45	0.111111
2	7	0.752987	1.61063	55	0.888889
2	8	3.49506	4.02658	140	0.111111
2	9	1.51293	2.81861	78	0.555556
3	1	2.14453	3.82525	76	0.666667
3	2	1.51293	2.41595	125	0.444444
3	3	1.46105	1.50997	189	0.222222
3	4	1.18511	1.91263	113	0.777778
3	5	2.46569	4.42924	52	0.444444
3	6	1.93143	3.52326	89	0.555556
3	7	2.83495	4.02658	157	0.222222
3	8	1.86521	3.22126	13	0.111111
3	9	2.73775	4.5299	157	0.666667
3	10	0.961276	0.503322	148	0.777778
3	11	2.9356	5.33522	162	0.777778
3	12	2.22067	2.71794	139	0.111111
3	13	2.38115	4.32857	88	0.333333
3	14	0.550078	1.10731	49	0.888889
3	15	1.31587	1.4093	85	0.111111
3	16	3.49506	3.01993	185	0.111111
3	17	3.61914	4.73123	169	0.222222
3	18	1.7395	2.61728	83	0.111111
3	19	3.49506	2.01329	131	0.111111
3	20	4.30887	4.22791	105	0
4	1	1.06734	1.20797	166	0.777778
4	2	3.03982	4.42924	139	0.222222
4	3	2.14453	3.62392	33	0.555556
4	4	1.56664	3.32193	190	0.777778
4	5	2.55323	4.32857	70	0.555556
4	6	2.64388	4.02658	109	0.333333
4	7	1.03074	2.31528	177	0.888889
4	8	1.03074	2.11395	53	0.777778
4	9	1.18511	1.10731	182	0.555556
4	10	4.16114	4.32857	130	0.111111
4	11	2	3.82525	161	0.666667
4	12	2.22067	2.31528	163	0.111111
4	13	1.36258	2.51661	187	0.777778
4	14	3.2595	4.02658	38	0.111111
4	15	1.51293	0.402658	63	0.222222
4	16	2.07101	1.10731	85	0.111111
4	17	2.83495	4.63057	157	0.222222
4	18	2.46569	6.03987	32	0.777778
4	19	2.73775	4.93256	85	0.555556
4	20	3.74763	4.63057	90	0.222222
5	1	2.46569	4.63057	105	0.777778
5	2	1.67986	3.72459	133	0.111111
5	3	2.55323	3.52326	29	0.333333
5	4	1.27075	2.71794	118	0.666667
5	5	1.46105	1.7113	97	0.222222
5	6	2	3.22126	4	0.111111
5	7	3.2595	5.03322	54	0.666667
5	8	2.83495	4.42924	9	0.222222
5	9	1.46105	3.1206	28	0.444444
5	10	4.78429	2.31528	64	0
5	11	1.56664	3.1206	170	0.666667
5	12	1.36258	1.7113	197	0.444444
5	13	2.46569	5.23455	26	0.555556
5	14	1.80126	3.1206	127	0.444444
5	15	2.14453	3.62392	5	0.111111
5	16	3.74763	4.63057	158	0.111111
5	17	2.64388	4.42924	84	0.444444
5	18	1.62226	1.81196	175	0.111111
5	19	2.83495	5.63721	120	0.777778
5	20	2.55323	4.12724	9	0.111111

## Sheet: purr_vs_chut_freqshift
MIF_set_number	MIF_number	CF_kHz	BW_octave	Duration_ms	Relative_Detection_Rate
1	1	1.46105	2.51661	147	0.444444
1	2	1.56664	3.52326	85	0.444444
1	3	2.38115	3.52326	83	0.333333
1	4	2.14453	3.22126	97	0.333333
1	5	1.14447	1.61063	62	0.222222
1	6	1.18511	0.301993	174	0.888889
1	7	1.62226	2.81861	29	0.444444
1	8	2.14453	3.62392	49	0.333333
2	1	1.62226	2.61728	34	0.222222
2	2	1.03074	0.90598	78	0.333333
2	3	1.18511	1.91263	86	0.333333
2	4	3.37522	4.93256	164	0.333333
2	5	1.93143	3.32193	71	0.333333
2	6	2.38115	3.32193	45	0.222222
2	7	0.752987	1.61063	55	0.111111
2	8	3.49506	4.02658	140	0.333333
2	9	1.51293	2.81861	78	0.222222
3	1	2.14453	3.82525	76	0.222222
3	2	1.51293	2.41595	125	0.777778
3	3	1.46105	1.50997	189	0.555556
3	4	1.18511	1.91263	113	0.333333
3	5	2.46569	4.42924	52	0.222222
3	6	1.93143	3.52326	89	0.222222
3	7	2.83495	4.02658	157	0.333333
3	8	1.86521	3.22126	13	0.333333
3	9	2.73775	4.5299	157	0.222222
3	10	0.961276	0.503322	148	0.555556
3	11	2.9356	5.33522	162	0.222222
3	12	2.22067	2.71794	139	0.888889
3	13	2.38115	4.32857	88	0.222222
3	14	0.550078	1.10731	49	0.111111
3	15	1.31587	1.4093	85	0.555556
3	16	3.49506	3.01993	185	0.888889
3	17	3.61914	4.73123	169	0.333333
3	18	1.7395	2.61728	83	0.222222
3	19	3.49506	2.01329	131	0.444444
3	20	4.30887	4.22791	105	0.222222
4	1	1.06734	1.20797	166	0.666667
4	2	3.03982	4.42924	139	0.111111
4	3	2.14453	3.62392	33	0.222222
4	4	1.56664	3.32193	190	0.222222
4	5	2.55323	4.32857	70	0.111111
4	6	2.64388	4.02658	109	0.333333
4	7	1.03074	2.31528	177	0.111111
4	8	1.03074	2.11395	53	0.222222
4	9	1.18511	1.10731	182	1
4	10	4.16114	4.32857	130	0.666667
4	11	2	3.82525	161	0.222222
4	12	2.22067	2.31528	163	0.555556
4	13	1.36258	2.51661	187	0.222222
4	14	3.2595	4.02658	38	0.555556
4	15	1.51293	0.402658	63	0.222222
4	16	2.07101	1.10731	85	0.444444
4	17	2.83495	4.63057	157	0.222222
4	18	2.46569	6.03987	32	0.333333
4	19	2.73775	4.93256	85	0.222222
4	20	3.74763	4.63057	90	0.111111
5	1	2.46569	4.63057	105	0.111111
5	2	1.67986	3.72459	133	0.444444
5	3	2.55323	3.52326	29	0.333333
5	4	1.27075	2.71794	118	0.444444
5	5	1.46105	1.7113	97	0.666667
5	6	2	3.22126	4	0.222222
5	7	3.2595	5.03322	54	0.222222
5	8	2.83495	4.42924	9	0.555556
5	9	1.46105	3.1206	28	0.555556
5	10	4.78429	2.31528	64	0.222222
5	11	1.56664	3.1206	170	0.666667
5	12	1.36258	1.7113	197	0.666667
5	13	2.46569	5.23455	26	0.444444
5	14	1.80126	3.1206	127	0.555556
5	15	2.14453	3.62392	5	0.444444
5	16	3.74763	4.63057	158	0.555556
5	17	2.64388	4.42924	84	0.222222
5	18	1.62226	1.81196	175	0.444444
5	19	2.83495	5.63721	120	0.222222
5	20	2.55323	4.12724	9	0.222222

## Sheet: wheek_vs_whine_generalization
MIF_set_number	MIF_number	CF_kHz	BW_octave	Duration_ms	Relative_Detection_Rate
1	1	3.74763	1.4093	151	1
1	2	4.30887	1.81196	174	1
1	3	4.62026	0.805316	117	1
1	4	1.56664	3.32193	190	1
1	5	4.16114	3.72459	200	1
1	6	2.83495	4.63057	157	1
1	7	8.36069	0.100664	62	1
1	8	3.61914	2.91927	100	1
2	1	2.38115	0.503322	32	1
2	2	3.88069	0.301993	19	1
2	3	3.37522	2.51661	25	1
2	4	2.22067	2.71794	139	1
2	5	2.22067	6.14053	66	1
2	6	11.0523	0.100664	58	1
2	7	3.14775	4.32857	183	1
2	8	2.55323	2.11395	125	0
2	9	3.14775	4.5299	41	1
2	10	2.29951	1.61063	125	1
2	11	5.69607	1.81196	106	1
2	12	2.73775	4.5299	157	0
2	13	4.62026	3.42259	120	0
2	14	1.46105	1.7113	186	1
3	1	2.38115	1.10731	75	1
3	2	2.46569	1.4093	190	1
3	3	2.73775	4.93256	85	1
3	4	4.95415	0.201329	170	1
3	5	2.38115	5.9392	18	1
3	6	2	6.64386	1	1
3	7	1.56664	3.1206	170	1
3	8	1.46105	2.31528	178	1
3	9	5.8983	2.31528	135	1
3	10	1.62226	2.81861	29	1
3	11	2.83495	5.43588	166	1
3	12	4.95415	0.402658	43	1
3	13	4.95415	0.603987	88	1
4	1	2.29951	0.805316	170	1
4	2	2.46569	1.4093	62	1
4	3	3.74763	3.01993	121	1
4	4	6.32456	1.7113	2	1
4	5	2.07101	0.704651	105	1
4	6	2.73775	0.704651	69	1
4	7	4.62026	2.41595	154	0
4	8	3.61914	4.32857	153	1
4	9	5.8983	3.1206	189	1
4	10	5.8983	2.11395	58	1
4	11	2.38115	2.31528	191	1
5	1	2.73775	0.503322	24	1
5	2	2.07101	2.11395	62	1
5	3	8.96489	2.31528	147	1
5	4	11.0523	1.7113	10	1
5	5	2.46569	6.03987	131	1
5	6	6.5491	0.805316	129	1
5	7	4.01847	1.00664	179	0
5	8	1.31587	1.4093	196	1
5	9	0.928318	3.62392	39	0
5	10	2.29951	5.23455	112	1
5	11	3.61914	2.71794	150	1
5	12	5.69607	2.01329	187	1

## Sheet: wheek_vs_whine_snr
MIF_set_number	MIF_number	CF_kHz	BW_octave	Duration_ms	Relative_Detection_Rate
1	1	3.74763	1.4093	151	0.888889
1	2	4.30887	1.81196	174	0.777778
1	3	4.62026	0.805316	117	0.666667
1	4	1.56664	3.32193	190	0.555556
1	5	4.16114	3.72459	200	0.555556
1	6	2.83495	4.63057	157	0.888889
1	7	8.36069	0.100664	62	0.777778
1	8	3.61914	2.91927	100	0.111111
2	1	2.38115	0.503322	32	1
2	2	3.88069	0.301993	19	0.777778
2	3	3.37522	2.51661	25	0.888889
2	4	2.22067	2.71794	139	0.777778
2	5	2.22067	6.14053	66	0.888889
2	6	11.0523	0.100664	58	0.666667
2	7	3.14775	4.32857	183	0.555556
2	8	2.55323	2.11395	125	0
2	9	3.14775	4.5299	41	0.888889
2	10	2.29951	1.61063	125	0.777778
2	11	5.69607	1.81196	106	0.666667
2	12	2.73775	4.5299	157	0
2	13	4.62026	3.42259	120	0
2	14	1.46105	1.7113	186	0.777778
3	1	2.38115	1.10731	75	0.888889
3	2	2.46569	1.4093	190	0.777778
3	3	2.73775	4.93256	85	0.111111
3	4	4.95415	0.201329	170	0.666667
3	5	2.38115	5.9392	18	0.111111
3	6	2	6.64386	1	1
3	7	1.56664	3.1206	170	0.777778
3	8	1.46105	2.31528	178	0.777778
3	9	5.8983	2.31528	135	0.888889
3	10	1.62226	2.81861	29	0.777778
3	11	2.83495	5.43588	166	0.666667
3	12	4.95415	0.402658	43	0.777778
3	13	4.95415	0.603987	88	0.777778
4	1	2.29951	0.805316	170	1
4	2	2.46569	1.4093	62	0.777778
4	3	3.74763	3.01993	121	0.444444
4	4	6.32456	1.7113	2	0.333333
4	5	2.07101	0.704651	105	0.888889
4	6	2.73775	0.704651	69	1
4	7	4.62026	2.41595	154	0
4	8	3.61914	4.32857	153	0.111111
4	9	5.8983	3.1206	189	0.444444
4	10	5.8983	2.11395	58	0.777778
4	11	2.38115	2.31528	191	0.777778
5	1	2.73775	0.503322	24	1
5	2	2.07101	2.11395	62	0.777778
5	3	8.96489	2.31528	147	0.333333
5	4	11.0523	1.7113	10	0.777778
5	5	2.46569	6.03987	131	0.666667
5	6	6.5491	0.805316	129	0.888889
5	7	4.01847	1.00664	179	0
5	8	1.31587	1.4093	196	0.555556
5	9	0.928318	3.62392	39	0.111111
5	10	2.29951	5.23455	112	0.111111
5	11	3.61914	2.71794	150	0.777778
5	12	5.69607	2.01329	187	0.777778

## Sheet: wheek_vs_whine_freqshift
MIF_set_number	MIF_number	CF_kHz	BW_octave	Duration_ms	Relative_Detection_Rate
1	1	3.74763	1.4093	151	0.666667
1	2	4.30887	1.81196	174	0.777778
1	3	4.62026	0.805316	117	0.666667
1	4	1.56664	3.32193	190	0.666667
1	5	4.16114	3.72459	200	0.444444
1	6	2.83495	4.63057	157	1
1	7	8.36069	0.100664	62	1
1	8	3.61914	2.91927	100	0.666667
2	1	2.38115	0.503322	32	0.666667
2	2	3.88069	0.301993	19	1
2	3	3.37522	2.51661	25	0.777778
2	4	2.22067	2.71794	139	0.444444
2	5	2.22067	6.14053	66	0.777778
2	6	11.0523	0.100664	58	0.888889
2	7	3.14775	4.32857	183	0.444444
2	8	2.55323	2.11395	125	0.333333
2	9	3.14775	4.5299	41	0.666667
2	10	2.29951	1.61063	125	0.777778
2	11	5.69607	1.81196	106	0.888889
2	12	2.73775	4.5299	157	0.222222
2	13	4.62026	3.42259	120	0.222222
2	14	1.46105	1.7113	186	1
3	1	2.38115	1.10731	75	0.666667
3	2	2.46569	1.4093	190	0.777778
3	3	2.73775	4.93256	85	0.444444
3	4	4.95415	0.201329	170	0.777778
3	5	2.38115	5.9392	18	0.111111
3	6	2	6.64386	1	0.888889
3	7	1.56664	3.1206	170	0.666667
3	8	1.46105	2.31528	178	0.777778
3	9	5.8983	2.31528	135	0.555556
3	10	1.62226	2.81861	29	0.666667
3	11	2.83495	5.43588	166	0.666667
3	12	4.95415	0.402658	43	0.888889
3	13	4.95415	0.603987	88	0.888889
4	1	2.29951	0.805316	170	0.777778
4	2	2.46569	1.4093	62	0.555556
4	3	3.74763	3.01993	121	0.666667
4	4	6.32456	1.7113	2	0.777778
4	5	2.07101	0.704651	105	1
4	6	2.73775	0.704651	69	0.777778
4	7	4.62026	2.41595	154	0.111111
4	8	3.61914	4.32857	153	0.333333
4	9	5.8983	3.1206	189	0.555556
4	10	5.8983	2.11395	58	0.777778
4	11	2.38115	2.31528	191	1
5	1	2.73775	0.503322	24	0.888889
5	2	2.07101	2.11395	62	0.555556
5	3	8.96489	2.31528	147	0.888889
5	4	11.0523	1.7113	10	1
5	5	2.46569	6.03987	131	1
5	6	6.5491	0.805316	129	0.555556
5	7	4.01847	1.00664	179	0.666667
5	8	1.31587	1.4093	196	0.333333
5	9	0.928318	3.62392	39	0
5	10	2.29951	5.23455	112	0.111111
5	11	3.61914	2.71794	150	0.666667
5	12	5.69607	2.01329	187	0.777778

## Sheet: whine_vs_wheek_generalization
MIF_set_number	MIF_number	CF_kHz	BW_octave	Duration_ms	Relative_Detection_Rate
1	1	2.55323	2.51661	142	1
1	2	1.86521	0.805316	41	0
1	3	1.18511	1.91263	113	0
1	4	1.62226	1.4093	18	1
1	5	1.41096	2.61728	65	0
1	6	1.93143	6.54319	143	0
1	7	5.50078	3.72459	91	0
1	8	3.61914	2.71794	150	1
1	9	2.38115	1.10731	75	0
1	10	2.22067	2.31528	163	1
1	11	4.01847	4.02658	163	1
1	12	5.13004	3.72459	172	1
1	13	2.14453	6.44253	86	0
1	14	4.16114	3.92592	120	1
1	15	1.80126	5.73788	31	1
1	16	0.807403	2.81861	146	1
1	17	2.14453	6.03987	189	0
1	18	0.610771	2.21462	103	0
1	19	1.46105	3.32193	156	1
1	20	1.80126	5.73788	4	0
2	1	4.46185	3.1206	173	1
2	2	4.30887	1.81196	174	1
2	3	2.29951	6.2412	143	0
2	4	3.03982	4.63057	36	1
2	5	3.88069	3.52326	165	1
2	6	2.29951	2.01329	5	0
2	7	2.83495	1.20797	123	1
2	8	3.03982	5.43588	186	1
2	9	2.83495	4.42924	9	1
2	10	4.16114	3.1206	192	1
2	11	3.49506	4.02658	140	1
2	12	1.67986	1.30864	16	0
2	13	5.13004	2.91927	103	1
2	14	0.416114	1.91263	14	0
2	15	2	4.02658	110	1
2	16	2.83495	5.43588	23	1
2	17	0.961276	0.301993	182	0
2	18	3.74763	4.63057	158	1
2	19	4.46185	4.32857	147	1
2	20	1.80126	3.92592	122	0
3	1	4.16114	2.51661	108	1
3	2	2.73775	0.704651	69	1
3	3	4.62026	2.41595	154	1
3	4	5.13004	1.91263	175	0
3	5	0.702238	3.42259	138	1
3	6	5.50078	2.91927	96	1
3	7	1.31587	3.22126	173	1
3	8	1.22718	1.4093	77	0
3	9	2.22067	3.1206	120	0
3	10	0.32595	0.402658	151	0
3	11	1.18511	4.32857	113	1
3	12	0.349506	0.805316	133	0
3	13	0.446185	1.91263	196	0
3	14	3.49506	4.02658	170	0
3	15	1.41096	5.43588	129	0
4	1	4.30887	3.82525	106	1
4	2	3.61914	0.100664	142	0
4	3	0.865752	3.22126	64	0
4	4	0.303982	0.603987	48	1
4	5	2.07101	2.51661	66	1
4	6	3.88069	3.52326	189	1
4	7	3.14775	4.73123	147	0
4	8	2.29951	1.61063	125	1
4	9	1.93143	2.31528	72	1
4	10	1.93143	2.51661	108	1
4	11	3.14775	4.5299	41	0
4	12	1.80126	4.32857	196	0
4	13	1.80126	6.34186	161	0
4	14	1.86521	3.82525	57	1
4	15	0.995405	4.22791	124	0
4	16	4.30887	4.22791	105	1
4	17	3.03982	4.42924	146	1
4	18	4.16114	4.12724	73	1
4	19	1.93143	1.50997	196	0
4	20	1.46105	2.31528	178	0
5	1	3.61914	4.32857	153	0
5	2	3.2595	5.23455	46	1
5	3	2.07101	5.13389	14	1
5	4	3.88069	4.12724	188	1
5	5	2.07101	6.14053	174	0
5	6	2.64388	5.83854	12	1
5	7	2.73775	5.33522	12	1
5	8	3.74763	3.42259	168	1
5	9	3.14775	1.91263	74	0
5	10	5.31218	3.22126	105	1
5	11	2.22067	5.73788	68	1
5	12	0.569607	2.61728	176	0
5	13	2.29951	3.62392	126	1
5	14	3.49506	3.01993	185	1
5	15	2.14453	2.01329	49	0
5	16	3.88069	4.73123	45	0
5	17	5.50078	1.10731	179	1
5	18	8.65752	2.41595	165	0
5	19	2.38115	5.9392	23	1
5	20	0.462026	2.01329	198	1

[truncated: 2 more sheets: whine_vs_wheek_snr, whine_vs_wheek_freqshift]
