# Supplementary material for: Vocalization categorization behavior explained by a feature-based auditory categorization model
Source: eLife journal article supplement (doi:10.7554/elife.78278), 2022-10-13
Supplement: supp [file elife-78278-supp-v1.zip]

## Vocalization categorization behavior explained by a feature-based auditory categorization model

Manaswini Kar, Marianny Pernia, Kayla Williams, Satyabrata Parida, Nathan A. Schneider, Madelyn McAndrew, Isha Kumbam, Srivatsun Sadagopan

**Figure 11 – figure supplement 1**

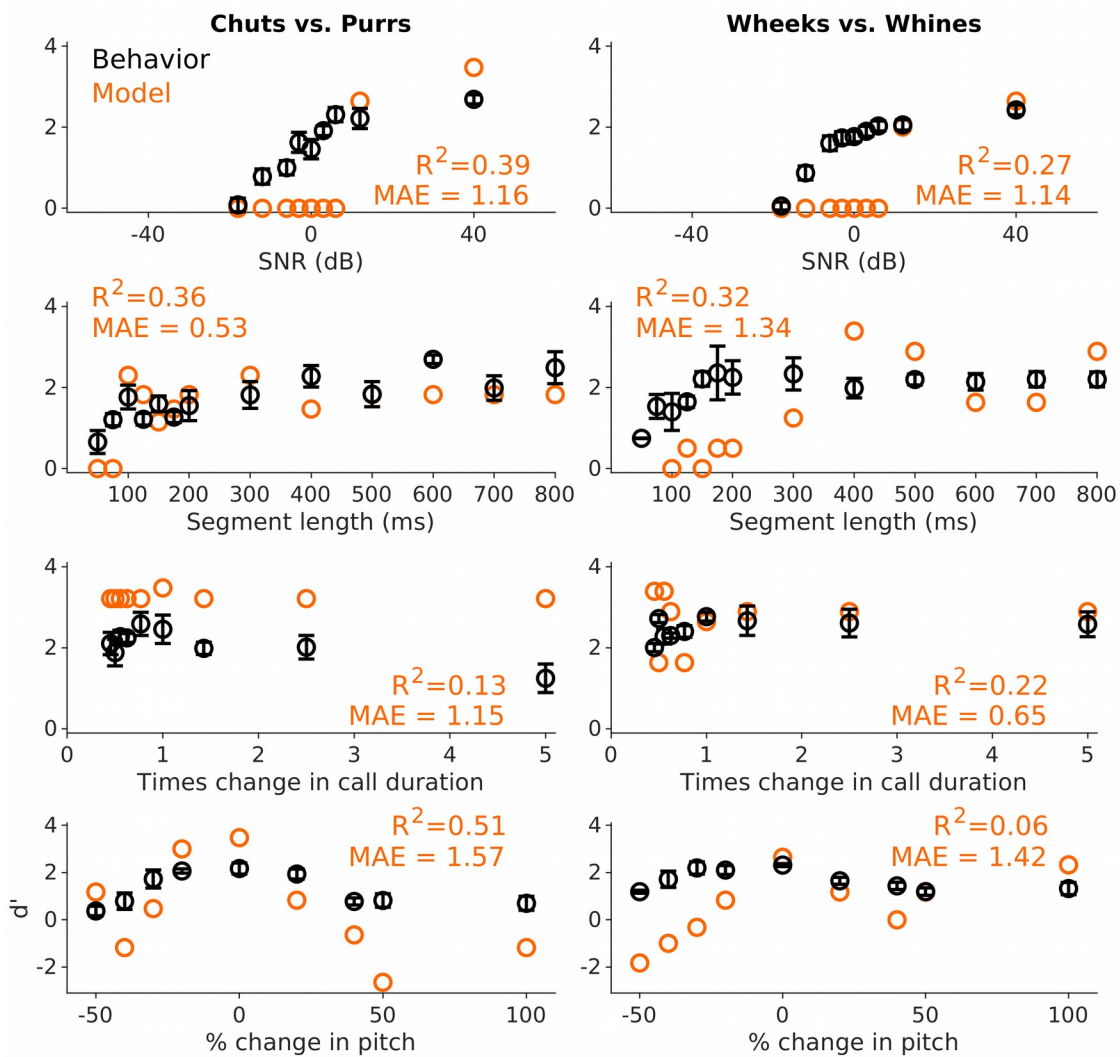

**Figure 11 – figure supplement 1: Performance of an SVM classifier on call categorization based on long-term spectrum.** An SVM classifier, trained to categorize calls from long-term spectrum alone, did not capture many aspects of GP behavior across the various stimulus manipulations. Black circles and lines correspond to GP behavioral performance (mean  $\pm$  SEM). Behavioral data are reproduced from Figs. 4, 5, 6 and 9. Orange circles correspond to SVM performance. Left column corresponds to the chuts vs. purrs task and right column corresponds to the wheels vs. whines task.
