# Supplementary material for: Vocalization categorization behavior explained by a feature-based auditory categorization model
Source: eLife journal article supplement (doi:10.7554/elife.78278), 2022-10-13
Supplement: supp [file elife-78278-supp-v1.zip]

## Vocalization categorization behavior explained by a feature-based auditory categorization model

Manaswini Kar, Marianny Pernia, Kayla Williams, Satyabrata Parida, Nathan A. Schneider, Madelyn McAndrew, Isha Kumbam, Srivatsun Sadagopan

**Figure 11 – figure supplement 2**

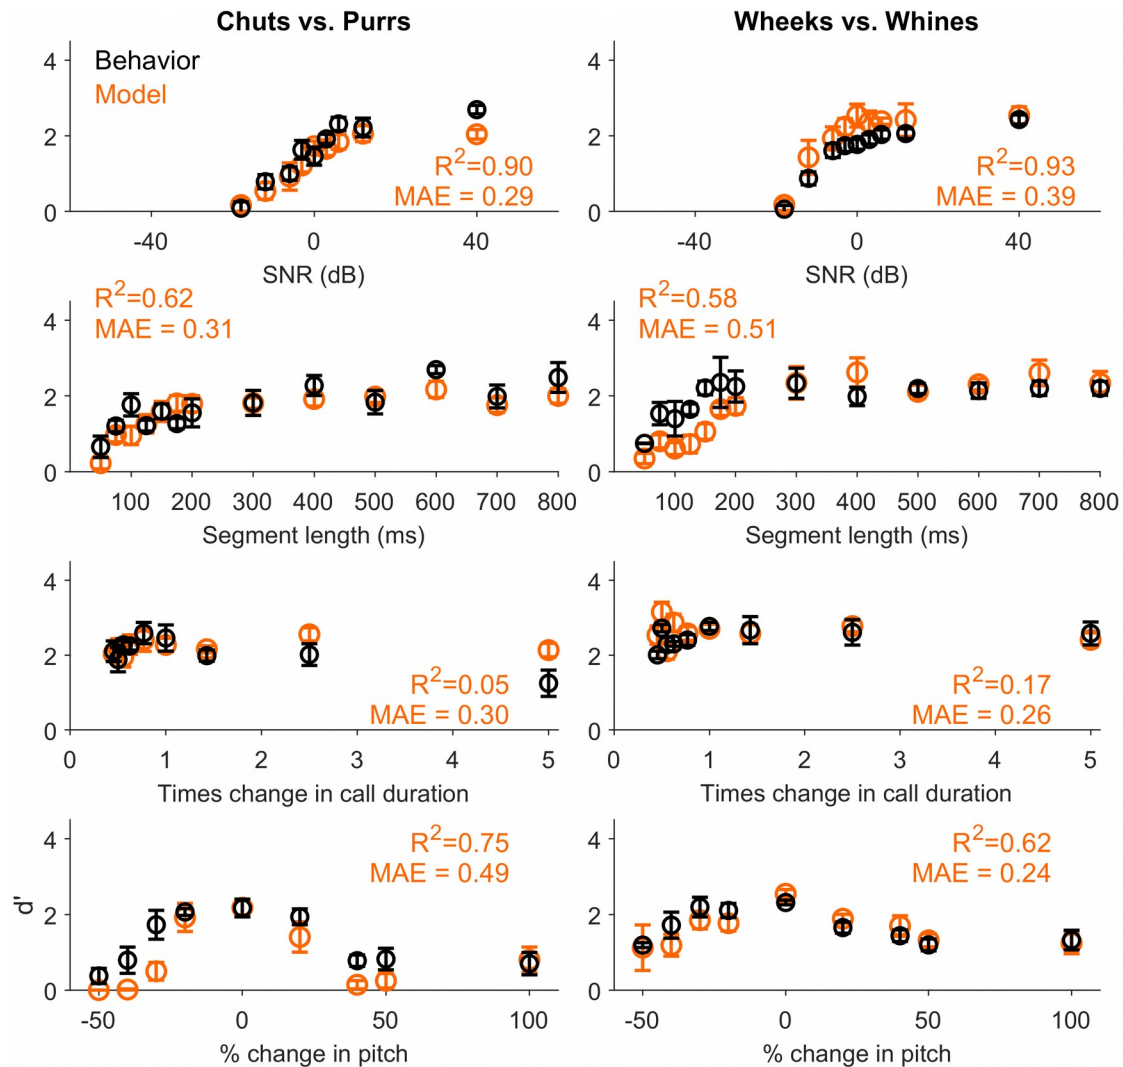

**Figure 11 – figure supplement 2: Call categorization performance of a feature-based model with feature duration restricted to 75 ms.** Based on behavioral results from the segment length experiment, we re-trained a feature-based model with maximum feature duration restricted to 75 ms to classify calls. The restricted-MIF model outperformed the model described in the main manuscript. This result illustrates how future experimental data could be leveraged to generate additional constraints for the feature-based categorization model. Black circles and lines correspond to GP behavioral performance (mean  $\pm$  SEM). Behavioral data are reproduced from Figs. 4, 5, 6 and 9. Orange circles correspond to SVM performance. Left column corresponds to the chuts vs. purrs task and right column corresponds to the wheels vs. whines task.
