# Supplementary material for: Vocalization categorization behavior explained by a feature-based auditory categorization model
Source: eLife journal article supplement (doi:10.7554/elife.78278), 2022-10-13
Supplement: supp [file elife-78278-supp-v1.zip]

# Vocalization categorization behavior explained by a feature-based auditory categorization model

Manaswini Kar, Marianny Pernia, Kayla Williams, Satyabrata Parida, Nathan A. Schneider, Madelyn McAndrew, Isha Kumbam, Srivatsun Sadagopan

**Figure 1 – figure supplement 1**

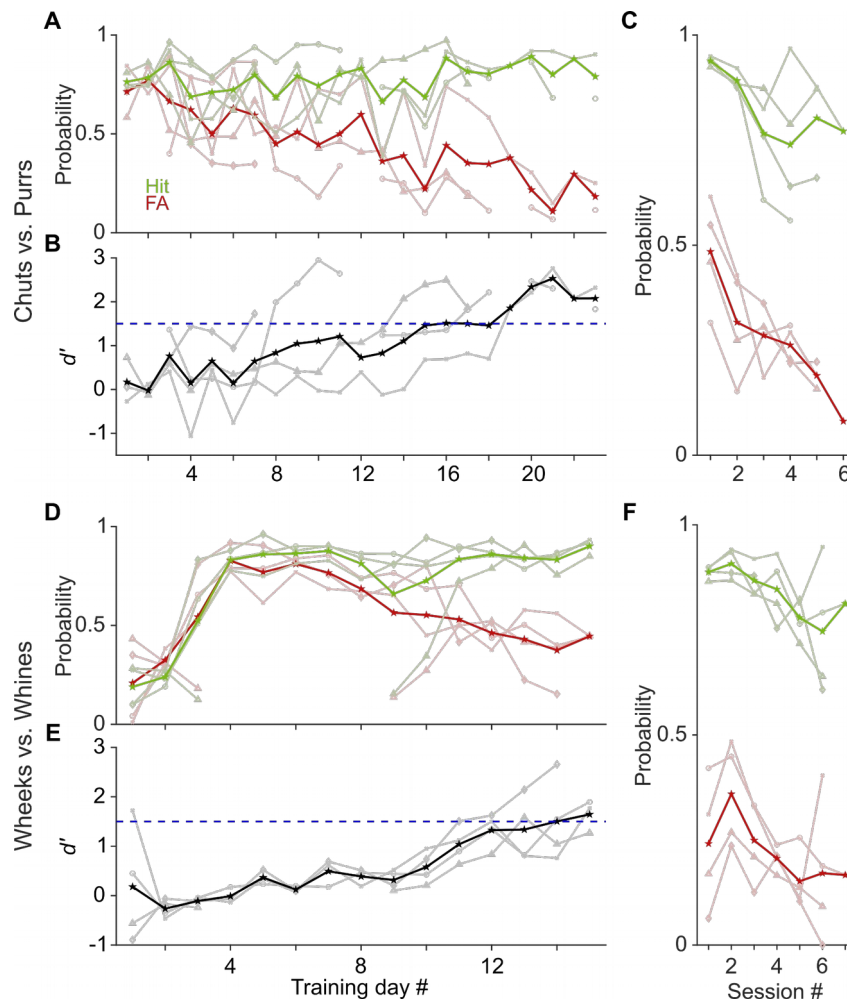

**Figure 1 – figure supplement 1: Learning rates of GPs performing a call categorization task. (A) and (D)** Probability of Hits (green) and False Alarms (red) as a function training day (averaged over ~6 sessions per day) for the chuts vs. purrs (A) and wheels vs. whines (D) tasks. Dark lines are averages of all subjects, faint lines correspond to individual subjects. (B) and (E) Sensitivity index ( $d'$ ) as a function of training day. Black line is average over 4 subjects, gray lines are individual subjects. Subjects were considered trained when their performance showed  $d' > 1.5$  (dashed blue line). (C) and (F) Hits and False Alarms of animals as a function of intra-day session number, averaged over four days after animals acquired the task.
