# Supplementary material for: Vocalization categorization behavior explained by a feature-based auditory categorization model
Source: eLife. 2022 Oct 13;11:e78278. doi: 10.7554/eLife.78278 (PMC9633061; doi:10.7554/eLife.78278)
Supplement: Supplementary file 1. [file elife-78278-supp1.xlsx]

## Sheet: Behavior GLM
Guinea pig stats output
........................
Chut vs. Purr Segment Length
........................
Data: cur_data
Models:
m.null: Response ~ StimType + (1 | AnimalID)
m.full: Response ~ ParamVal * StimType + (1 | AnimalID)
npar AIC BIC logLik deviance Chisq Df Pr(>Chisq)
m.null 3 3234.2 3252.3 -1614.1 3228.2
m.full 5 3179.5 3209.7 -1584.7 3169.5 58.698 2 1.795e-13 ***
---
Signif. codes: 0 ‘***’ 0.001 ‘**’ 0.01 ‘*’ 0.05 ‘.’ 0.1 ‘ ’ 1
[1] " --- Prediction accuracy of models --- "
[1] "Prediction accuracy: Full = 0.77 | Half = 0.77"
........................
Chut vs. Purr SNR
........................
Data: cur_data
Models:
m.null: Response ~ StimType + (1 | AnimalID)
m.full: Response ~ ParamVal * StimType + (1 | AnimalID)
npar AIC BIC logLik deviance Chisq Df Pr(>Chisq)
m.null 3 3348.3 3366.4 -1671.1 3342.3
m.full 5 3227.7 3257.9 -1608.8 3217.7 124.57 2 < 2.2e-16 ***
---
Signif. codes: 0 ‘***’ 0.001 ‘**’ 0.01 ‘*’ 0.05 ‘.’ 0.1 ‘ ’ 1
[1] " --- Prediction accuracy of models --- "
[1] "Prediction accuracy: Full = 0.75 | Half = 0.75"
........................
Chut vs. Purr Freq. Shift
........................
Data: cur_data
Models:
m.null: Response ~ StimType + (1 | AnimalID)
m.full: Response ~ ParamVal * StimType + ParamSign + (1 | AnimalID)
npar AIC BIC logLik deviance Chisq Df Pr(>Chisq)
m.null 3 2986.0 3003.9 -1490.0 2980.0
m.full 6 2885.3 2921.1 -1436.7 2873.3 106.65 3 < 2.2e-16 ***
---
Signif. codes: 0 ‘***’ 0.001 ‘**’ 0.01 ‘*’ 0.05 ‘.’ 0.1 ‘ ’ 1
[1] " --- Prediction accuracy of models --- "
[1] "Prediction accuracy: Full = 0.76 | Half = 0.72"
........................
Chut vs. Purr Tempo Shift
........................
Data: cur_data
Models:
m.null: Response ~ StimType + (1 | AnimalID)
m.full: Response ~ ParamVal * StimType + ParamSign + (1 | AnimalID)
npar AIC BIC logLik deviance Chisq Df Pr(>Chisq)
m.null 3 2651 2669 -1322.5 2645
m.full 6 2611 2647 -1299.5 2599 45.992 3 5.693e-10 ***
---
Signif. codes: 0 ‘***’ 0.001 ‘**’ 0.01 ‘*’ 0.05 ‘.’ 0.1 ‘ ’ 1
[1] " --- Prediction accuracy of models --- "
[1] "Prediction accuracy: Full = 0.83 | Half = 0.83"
........................
Wheek vs. Whine Segment Length
........................
Data: cur_data
Models:
m.null: Response ~ StimType + (1 | AnimalID)
m.full: Response ~ ParamVal * StimType + (1 | AnimalID)
npar AIC BIC logLik deviance Chisq Df Pr(>Chisq)
m.null 3 2694.6 2712.4 -1344.3 2688.6
m.full 5 2578.4 2608.0 -1284.2 2568.4 120.23 2 < 2.2e-16 ***
---
Signif. codes: 0 ‘***’ 0.001 ‘**’ 0.01 ‘*’ 0.05 ‘.’ 0.1 ‘ ’ 1
[1] " --- Prediction accuracy of models --- "
[1] "Prediction accuracy: Full = 0.8 | Half = 0.8"
........................
Wheek vs. Whine SNR
........................
Data: cur_data
Models:
m.null: Response ~ StimType + (1 | AnimalID)
m.full: Response ~ ParamVal * StimType + (1 | AnimalID)
npar AIC BIC logLik deviance Chisq Df Pr(>Chisq)
m.null 3 5815.5 5835.6 -2904.8 5809.5
m.full 5 5637.0 5670.5 -2813.5 5627.0 182.51 2 < 2.2e-16 ***
---
Signif. codes: 0 ‘***’ 0.001 ‘**’ 0.01 ‘*’ 0.05 ‘.’ 0.1 ‘ ’ 1
[1] " --- Prediction accuracy of models --- "
[1] "Prediction accuracy: Full = 0.79 | Half = 0.77"
........................
Wheek vs. Whine Freq. Shift
........................
Data: cur_data
Models:
m.null: Response ~ StimType + (1 | AnimalID)
m.full: Response ~ ParamVal * StimType + ParamSign + (1 | AnimalID)
npar AIC BIC logLik deviance Chisq Df Pr(>Chisq)
m.null 3 2278.1 2295.2 -1136.1 2272.1
m.full 6 2125.9 2160.0 -1057.0 2113.9 158.16 3 < 2.2e-16 ***
---
Signif. codes: 0 ‘***’ 0.001 ‘**’ 0.01 ‘*’ 0.05 ‘.’ 0.1 ‘ ’ 1
[1] " --- Prediction accuracy of models --- "
[1] "Prediction accuracy: Full = 0.78 | Half = 0.77"
........................
Wheek vs. Whine Tempo Shift
........................
Data: cur_data
Models:
m.null: Response ~ StimType + (1 | AnimalID)
m.full: Response ~ ParamVal * StimType + ParamSign + (1 | AnimalID)
npar AIC BIC logLik deviance Chisq Df Pr(>Chisq)
m.null 3 1386.7 1403.3 -690.33 1380.7
m.full 6 1379.1 1412.3 -683.54 1367.1 13.586 3 0.003527 **
---
Signif. codes: 0 ‘***’ 0.001 ‘**’ 0.01 ‘*’ 0.05 ‘.’ 0.1 ‘ ’ 1
[1] " --- Prediction accuracy of models --- "
[1] "Prediction accuracy: Full = 0.88 | Half = 0.88"

## Sheet: Model GLM
Model stats output
........................
Chut vs. Purr Segment Length
........................
Data: cur_data
Models:
m.null: Response ~ StimType + (1 | ModelID)
m.full: Response ~ ParamVal * StimType + (1 | ModelID)
npar AIC BIC logLik deviance Chisq Df Pr(>Chisq)
m.null 3 5914.1 5933.8 -2954.1 5908.1
m.full 5 5304.9 5337.7 -2647.5 5294.9 613.22 2 < 2.2e-16 ***
---
Signif. codes: 0 ‘***’ 0.001 ‘**’ 0.01 ‘*’ 0.05 ‘.’ 0.1 ‘ ’ 1
[1] " --- Prediction accuracy of models --- "
[1] "Prediction accuracy: Full = 0.78 | Half = 0.72"
........................
Chut vs. Purr SNR
........................
Data: cur_data
Models:
m.null: Response ~ StimType + (1 | ModelID)
m.full: Response ~ ParamVal * StimType + (1 | ModelID)
npar AIC BIC logLik deviance Chisq Df Pr(>Chisq)
m.null 3 4215.9 4234.5 -2105.0 4209.9
m.full 5 3817.6 3848.6 -1903.8 3807.6 402.29 2 < 2.2e-16 ***
---
Signif. codes: 0 ‘***’ 0.001 ‘**’ 0.01 ‘*’ 0.05 ‘.’ 0.1 ‘ ’ 1
[1] " --- Prediction accuracy of models --- "
[1] "Prediction accuracy: Full = 0.78 | Half = 0.7"
........................
Chut vs. Purr Freq. Shift
........................
Data: cur_data
Models:
m.null: Response ~ StimType + (1 | ModelID)
m.full: Response ~ ParamVal * StimType + ParamSign + (1 | ModelID)
npar AIC BIC logLik deviance Chisq Df Pr(>Chisq)
m.null 3 4327.6 4346.1 -2160.8 4321.6
m.full 6 4239.7 4276.8 -2113.8 4227.7 93.923 3 < 2.2e-16 ***
---
Signif. codes: 0 ‘***’ 0.001 ‘**’ 0.01 ‘*’ 0.05 ‘.’ 0.1 ‘ ’ 1
[1] " --- Prediction accuracy of models --- "
[1] "Prediction accuracy: Full = 0.7 | Half = 0.69"
........................
Chut vs. Purr Tempo Shift
........................
Data: cur_data
Models:
m.null: Response ~ StimType + (1 | ModelID)
m.full: Response ~ ParamVal * StimType + ParamSign + (1 | ModelID)
npar AIC BIC logLik deviance Chisq Df Pr(>Chisq)
m.null 3 3439.0 3457.6 -1716.5 3433.0
m.full 6 3401.8 3438.9 -1694.9 3389.8 43.286 3 2.14e-09 ***
---
Signif. codes: 0 ‘***’ 0.001 ‘**’ 0.01 ‘*’ 0.05 ‘.’ 0.1 ‘ ’ 1
[1] " --- Prediction accuracy of models --- "
[1] "Prediction accuracy: Full = 0.81 | Half = 0.81"
........................
Wheek vs. Whine Segment Length
........................
Data: cur_data
Models:
m.null: Response ~ StimType + (1 | ModelID)
m.full: Response ~ ParamVal * StimType + (1 | ModelID)
npar AIC BIC logLik deviance Chisq Df Pr(>Chisq)
m.null 3 4586.2 4605.5 -2290.1 4580.2
m.full 5 3814.8 3847.0 -1902.4 3804.8 775.4 2 < 2.2e-16 ***
---
Signif. codes: 0 ‘***’ 0.001 ‘**’ 0.01 ‘*’ 0.05 ‘.’ 0.1 ‘ ’ 1
[1] " --- Prediction accuracy of models --- "
[1] "Prediction accuracy: Full = 0.84 | Half = 0.74"
........................
Wheek vs. Whine SNR
........................
Data: cur_data
Models:
m.null: Response ~ StimType + (1 | ModelID)
m.full: Response ~ ParamVal * StimType + (1 | ModelID)
npar AIC BIC logLik deviance Chisq Df Pr(>Chisq)
m.null 3 3292.4 3310.9 -1643.2 3286.4
m.full 5 3092.6 3123.6 -1541.3 3082.6 203.72 2 < 2.2e-16 ***
---
Signif. codes: 0 ‘***’ 0.001 ‘**’ 0.01 ‘*’ 0.05 ‘.’ 0.1 ‘ ’ 1
[1] " --- Prediction accuracy of models --- "
[1] "Prediction accuracy: Full = 0.84 | Half = 0.82"
........................
Wheek vs. Whine Freq. Shift
........................
Data: cur_data
Models:
m.null: Response ~ StimType + (1 | ModelID)
m.full: Response ~ ParamVal * StimType + ParamSign + (1 | ModelID)
npar AIC BIC logLik deviance Chisq Df Pr(>Chisq)
m.null 3 3976.2 3994.7 -1985.1 3970.2
m.full 6 3526.1 3563.2 -1757.0 3514.1 456.06 3 < 2.2e-16 ***
---
Signif. codes: 0 ‘***’ 0.001 ‘**’ 0.01 ‘*’ 0.05 ‘.’ 0.1 ‘ ’ 1
[1] " --- Prediction accuracy of models --- "
[1] "Prediction accuracy: Full = 0.78 | Half = 0.75"
........................
Wheek vs. Whine Tempo Shift
........................
Data: cur_data
Models:
m.null: Response ~ StimType + (1 | ModelID)
m.full: Response ~ ParamVal * StimType + ParamSign + (1 | ModelID)
npar AIC BIC logLik deviance Chisq Df Pr(>Chisq)
m.null 3 2095.2 2113.5 -1044.6 2089.2
m.full 6 2100.9 2137.3 -1044.5 2088.9 0.3222 3 0.9558
[1] " --- Prediction accuracy of models --- "
[1] "Prediction accuracy: Full = 0.9 | Half = 0.9"
