# Supplementary material for: Vocalization categorization behavior explained by a feature-based auditory categorization model
Source: eLife. 2022 Oct 13;11:e78278. doi: 10.7554/eLife.78278 (PMC9633061; doi:10.7554/eLife.78278)
Supplement: Supplementary file 2. [file elife-78278-supp2.xlsx]

## Sheet: Chut vs Purr
S. No.	Paradigm	Overall effect	p val overall	Pairwise comps.	Pairwise t-test FDRBH corrected	Pairwise t-test FDRBH corrected		Values	Mean d'	Standard deviation d'
1	Chuts ISI switch	Significant	0.039
	Purrs ISI switch	Non-significant	0.218
	Rand_Sil_ISI	Non-significant	0.535986	vs Silent ISI	Non-significant	0.435352		Regular	2.0772	0.15479
				vs Random ISI	Non-significant	0.535829		Random ISI	2.1966	0.16912
								Silent ISI	2.2204	0.24772
2	Reversal	Non-significant	0.582					Reversed	2.5597

## Sheet: Wheek vs whine
S. No.	Paradigm	Overall effect	p val overall	Pairwise comps.	Pairwise t-test FDRBH corrected	Pairwise t-test FDRBH corrected		Values	Mean d'	Standard deviation d'
1	Chuts ISI switch	Non-significant	0.218
	Purrs ISI switch	Non-significant	0.099
	Rand_Sil_ISI	Non-significant	0.365248	vs Silent ISI	Non-significant	0.549376		Regular	2.40389	0.0839986
				vs Random ISI	Non-significant	0.549376		Random ISI	2.20861	0.396792
								Silent ISI	2.58311	0.284559
2	Reversal	Non-significant	0.151					Reversed	1.8246
3	3000 LP	Non-significant	0.169					Filtered	1.1477
